1                   **SARS-CoV-2 variants resist antibody neutralization**

2                                   **and broaden host ACE2 usage**

3

4   Ruohe Wang<sup>1,2,#</sup>, Qi Zhang<sup>1,#</sup>, Jiwan Ge<sup>3,#</sup>, Wenlin Ren<sup>4</sup>, Rui Zhang<sup>1</sup>, Jun Lan<sup>3</sup>, Bin Ju<sup>5,6</sup>,  
5   Bin Su<sup>7</sup>, Fengting Yu<sup>8</sup>, Peng Chen<sup>1</sup>, Huiyu Liao<sup>7</sup>, Yingmei Feng<sup>7</sup>, Xuemei Li<sup>7</sup>,  
6   Xuanling Shi<sup>1</sup>, Zheng Zhang<sup>5,6</sup>, Fujie Zhang<sup>8</sup>, Qiang Ding<sup>4</sup>, Tong Zhang<sup>7,\*</sup>, Xinquan  
7   Wang<sup>3,\*</sup>, Linqi Zhang<sup>1,\*</sup>

8

9   <sup>1</sup> Center for Global Health and Infectious Diseases, Comprehensive AIDS Research  
10   Center, Beijing Advanced Innovation Center for Structural Biology, School of  
11   Medicine, Tsinghua University, Beijing 100084, China.

12   <sup>2</sup> Tsinghua-Peking Joint Center for Life Sciences, Beijing 100084, China.

13   <sup>3</sup> The Ministry of Education Key Laboratory of Protein Science, Beijing Advanced  
14   Innovation Center for Structural Biology, Beijing Frontier Research Center for  
15   Biological Structure, Collaborative Innovation Center for Biotherapy, School of Life  
16   Sciences, Tsinghua University, Beijing 100084, China

17   <sup>4</sup> Center for Infectious Disease Research, School of Medicine, Tsinghua University,  
18   Beijing 100084, China. Beijing Advanced Innovation Center for Structural Biology,  
19   Tsinghua University, Beijing 100084, China

20   <sup>5</sup> Institute for Hepatology, National Clinical Research Center for Infectious Disease,  
21   Shenzhen Third People's Hospital; The Second Affiliated Hospital, School of Medicine,  
22   Southern University of Science and Technology, Shenzhen 518112, Guangdong

23 Province, China

24 <sup>6</sup> The Second Affiliated Hospital, School of Medicine, Southern University of Science  
25 and Technology, Shenzhen, China.

26 <sup>7</sup> Beijing Youan Hospital, Capital Medical University, Beijing 100069, China

27 <sup>8</sup> Clinical and Research Center of Infectious Diseases, Beijing Ditan Hospital, Capital  
28 Medical University, No.8, Jing shun Dong jie, Chaoyang, 100015, District Beijing,  
29 China.

30

31 # These authors contributed equally to this work.

32 \* Correspondence: [zhanglinqi@tsinghua.edu.cn](mailto:zhanglinqi@tsinghua.edu.cn), [xinquanwang@mail.tsinghua.edu.cn](mailto:xinquanwang@mail.tsinghua.edu.cn),  
33 [zt\\_doc@ccmu.edu.cn](mailto:zt_doc@ccmu.edu.cn)

34

35

36 **Abstract**

37

38 New SARS-CoV-2 variants continue to emerge from the current global pandemic, some  
39 of which can replicate faster and with greater transmissibility and pathogenicity. In  
40 particular, UK501Y.V1 identified in UK, SA501Y.V2 in South Africa, and BR501Y.V3  
41 in Brazil are raising serious concerns as they spread quickly and contain spike protein  
42 mutations that may facilitate escape from current antibody therapies and vaccine  
43 protection. Here, we constructed a panel of 28 SARS-CoV-2 pseudoviruses bearing  
44 single or combined mutations found in the spike protein of these three variants, as well  
45 as additional nine mutations that within or close by the major antigenic sites in the spike  
46 protein identified in the GISAID database. These pseudoviruses were tested against a  
47 panel of monoclonal antibodies (mAbs), including some approved for emergency use  
48 to treat SARS-CoV-2 infection, and convalescent patient plasma collected early in the  
49 pandemic. SA501Y.V2 pseudovirus was the most resistant, in magnitude and breadth,  
50 against mAbs and convalescent plasma, followed by BR501Y.V3, and then  
51 UK501Y.V1. This resistance hierarchy corresponds with Y144del and 242-244del  
52 mutations in the N-terminal domain as well as K417N/T, E484K and N501Y mutations  
53 in the receptor binding domain (RBD). Crystal structural analysis of RBD carrying  
54 triple K417N-E484K-N501Y mutations found in SA501Y.V2 bound with mAb P2C-  
55 1F11 revealed a molecular basis for antibody neutralization and escape. SA501Y.V2  
56 and BR501Y.V3 also acquired substantial ability to use mouse and mink ACE2 for entry.  
57 Taken together, our results clearly demonstrate major antigenic shifts and potentially  
58 broadening the host range of SA501Y.V2 and BR501Y.V3, which pose serious  
59 challenges to our current antibody therapies and vaccine protection.

60

61

62 **Main text**

63

64 Current neutralizing antibody and vaccine strategies against severe acute respiratory  
65 syndrome coronavirus 2 (SARS-CoV-2), the causative agent of coronavirus disease-  
66 2019 (COVID-19), were developed by targeting the prototype SARS-CoV-2  
67 Wuhan-Hu-1 strain identified during the early phase of the pandemic (*1-12*). Several  
68 regulatory agencies recently approved a selection of these antibodies and vaccines for  
69 emergency use authorization (EUA), and their rollout to high-risk populations began  
70 late last year (*13*). For instance, Eli Lilly and Regeneron developed monoclonal  
71 neutralizing antibodies (mAbs) targeting the receptor-binding domain (RBD) of the  
72 spike (S) protein that were shown to reduce patient viral loads and COVID-19-related  
73 symptoms and hospitalizations (*14-16*). Others and we also reported the isolation and  
74 characterization several hundreds of RBD-specific mAbs from SARS-CoV-2 infected  
75 individuals (*3-5, 7, 8, 17*), and some of which are under active clinical development.  
76 Pfizer/BioNtech and Moderna developed mRNA vaccines that express a stabilized form  
77 of the S protein, which demonstrated 95% efficacy against symptomatic infection and  
78 a reduced risk of severe disease (*18, 19*). Additional vaccine modalities, such as  
79 adenovirus-based, protein subunit and inactivated vaccines, have also demonstrated  
80 reasonably good efficacy levels (*20-23*).

81

82 However, there is growing concern that the epidemic raging worldwide may be  
83 generating new SARS-CoV-2 variants that are antigenically distinct from the prototype  
84 Wuhan-Hu-1 strain, rendering current antibody and vaccine strategies ineffective (*24*).  
85 At the time of manuscript submission, approximately 455,000 SARS-CoV-2 genome  
86 sequences are listed in the GISAID database and more than 4,400 amino acid

87 substitutions have been found in the S protein. Of the latter, 1276 are in the N-terminal  
88 domain (NTD), 596 in the RBD, 569 in the subdomain 1 and 2 (SD1-2), and 1867 in  
89 the S2 region (25). While these mutations are driven by the intrinsic, error-prone nature  
90 of the viral encoded RNA dependent RNA polymerase (RdRp), their survival and  
91 maintenance rely on selective advantage during natural infection, transmission, and  
92 host adaptation. For example, the S protein D614G mutation became dominant just a  
93 few months into the pandemic and was associated with greater infectivity and  
94 transmissibility, although no detectable changes in antigenicity and disease severity  
95 were identified (26-29). However, recently identified variants of SARS-CoV-2  
96 UK501Y.V1 (B.1.1.7) in the UK, SA501Y.V2 (B.1.351) in South Africa, and  
97 BR501Y.V3 (P.1) in Brazil are raising serious concerns (30-34). They are not only  
98 rapidly displacing local SARS-CoV-2 strains, but also carry RBD mutations that are  
99 critical for interactions with the ACE2 receptor and neutralizing antibodies (35-38).  
100 Specifically, UK501Y.V1, SA501Y.V2 and BR501Y.V3 share the N501Y mutation  
101 previously shown to enhance binding affinity to ACE2 (39, 40). SA501Y.V2 and  
102 BR501Y.V3 each have three mutation sites in common within the RBD, such as  
103 K417N/T, E484K, and N501Y, which may change their antigenic profile. In addition,  
104 various deletion mutants were found in the NTD such as 69-70del and Y144del in  
105 UK501Y.V1 and 242-244del in SA501Y.V2 (32, 36). A few mutations in the SD1-2  
106 region near the Furin cleavage site were also identified, such as P681H in UK501Y.V1  
107 and A701V in SA501Y.V2. As all these mutations fall in or are proximal to major S  
108 protein antigenic sites, they may adversely affect antibody neutralization induced by  
109 natural infection or by vaccination.

110

111 To test the impact of these mutations on neutralization sensitivity, we generated a panel

112 of 28 SARS-CoV-2 pseudoviruses corresponding with the identified mutations. These  
113 include nine mutations in the UK501Y.V1 variant, ten in the SA501Y.V2 variant, 12 in  
114 the BR501Y.V3 variant, and high prevalent single mutations in the NTD, RBD, SD1-2,  
115 and S2 domain, identified across the entire S protein in the GISAID database (Fig.1 and  
116 Fig. S1). The pseudoviruses were then subjected to neutralization tests against 12  
117 human neutralizing mAbs, including some had received EUA and some initially  
118 isolated from SARS-CoV-2 infected patients in our laboratory, and 23 convalescent  
119 plasma collected from SARS-CoV-2 patients between January and February 2020. Our  
120 results show that SA501Y.V2 is the most resistant mAbs and convalescent plasma,  
121 followed by BR501Y.V3, and then UK501Y.V1. Such resistant hierarchy is attributed  
122 to the extent of mutations identified in NTD and RBD. Crystal structural analysis of  
123 RBD carrying triple K417N-E484K-N501Y mutations found in SA501Y.V2 bound  
124 with mAb P2C-1F11 revealed a molecular basis for antibody neutralization and escape.  
125 We also show that mutations acquired by SA501Y.V2 and BR501Y.V3 substantially  
126 improve their ability to use mouse and mink ACE2 for entry. Taken together, our results  
127 clearly demonstrate major antigenic shifts and potentially broadening the host range of  
128 SA501Y.V2 and BR501Y.V3, posing serious challenges to our current antibody  
129 therapies and vaccine protection.

130

## 131 **Results**

132

133 **Susceptibility of SARS-CoV-2 variant to mAb neutralization.** We first evaluated the  
134 susceptibility levels of the 28 pseudoviruses to neutralization by 12 mAbs, including  
135 11 anti-RBD and 1 anti-NTD mAbs. The anti-RBD mAbs fall into one of four major  
136 classes based on structural features affecting their mode of recognition and epitope

137 specificity (Fig. 1 and Fig. S2) (2, 3, 5, 17, 37, 38, 41-44). These epitopes assignments  
138 are related to the six major sites put forward by Yuan and colleagues (45). The wildtype  
139 (WT) pseudovirus used throughout the analysis was the prototype Wuhan-Hu-1 strain  
140 with a D614G mutation (WT D614G). As shown in Fig. 1 and Fig. S3, SA501Y.V2 and  
141 BR501Y.V3 pseudoviruses were more resistant in terms of magnitude and breadth  
142 relative to UK501Y.V1. SA501Y.V2 and BR501Y.V3 pseudoviruses were fully  
143 resistant to almost all Class I and Class II anti-RBD mAbs except for P2C-1F11, while  
144 Class III and Class IV were largely unaffected. Many mAbs had neutralizing activity  
145 below the detection limit (BDL) even when tested at the highest concentration (1 µg/mL)  
146 (Fig. 1A). The three variants were also resistant to the anti-NTD mAb 4A8, with  
147 UK501Y.V1 and SA501Y.V2 pseudoviruses showing greater resistance relative to  
148 BR501Y.V3.

149

150 Examination of the resistance patterns across the single and triple mutant pseudoviruses  
151 showed that the K417N and K417T mutations correlated with resistance to Class I  
152 mAbs, while the E484K mutation correlated with Class II (Fig. 1A). The triple mutant  
153 K417N-E484K-N501Y pseudovirus, like SA501Y.V2 and BR501Y.V3, was resistant  
154 to both Class I and II mAbs, suggesting that combination of the three RBD mutations  
155 is key in conferring complete resistance. Neutralization by the 4A8 mAb was eliminated  
156 in two NTD deletion mutant pseudoviruses, Y144del and 242-244del. These deletions  
157 were initially identified in UK501Y.V1 and SA501Y.V2 and likely contribute to their  
158 resistance profiles (31, 32, 46). As both deletion mutations largely fall in the NTD  
159 supersite, UK501Y.V1 and SA501Y.V2 are likely resistant to other members of the  
160 same antibody family (8, 46-49).

161

**A**

|          |         | WT D614G  | V137L      | S496Y/V1   | S496Y/V2   | BR501Y.V3  | L18F | D95E       | Y446A      | G222S      | Y223A      | Y242A/M68I | K417N      | K417T | N439K | Y453F | S477L | F458L      | E484K      | E484L | S394P      | N501Y      | A746S | A750D | Q583R | H655Y | P681H | T780I | S802A | D1152R |      |
|----------|---------|-----------|------------|------------|------------|------------|------|------------|------------|------------|------------|------------|------------|-------|-------|-------|-------|------------|------------|-------|------------|------------|-------|-------|-------|-------|-------|-------|-------|--------|------|
|          |         | WT        | Variants   |            |            |            |      |            |            |            |            |            |            |       |       |       | NTD   | RRB        | S245C      |       |            |            | S2    |       |       |       |       |       |       |        |      |
| anti-RBD | Class I | REGN10933 | +1.0       | +1.6       | -13.0      | -8.2       | +1.2 | -1.2       | +1.2       | -1.4       | +1.0       | -4.3       | -7.0       | -1.2  | -47.3 | +1.1  | +1.7  | -7.1       | -35.0      | -2.1  | +1.5       | -36.9      | +1.7  | +1.0  | -1.2  | +1.3  | +1.5  | +1.0  | +1.3  | +1.2   |      |
|          |         | CB6       | +1.0       | +4.9       | <b>BDL</b> | <b>BDL</b> | +1.6 | +1.5       | +1.6       | -1.7       | +5.4       | <b>BDL</b> | <b>BDL</b> | +2.6  | +1.6  | +2.0  | +2.7  | -2.4       | -2.9       | +1.7  | -2.9       | <b>BDL</b> | +4.7  | +3.0  | +1.9  | +1.8  | +2.5  | +1.2  | +1.8  | +1.5   |      |
|          |         | P2C-1F11  | +1.0       | +1.4       | +2.2       | +3.4       | +1.0 | +1.0       | -1.2       | -1.6       | -1.0       | +1.0       | +1.5       | -1.0  | +1.0  | +1.2  | +1.6  | -1.4       | -3.1       | +1.4  | +1.0       | +2.1       | +1.9  | +1.1  | -1.1  | -1.1  | +1.8  | -1.2  | +1.0  | -1.1   |      |
|          |         | P5A-1D2   | +1.0       | +3.3       | <b>BDL</b> | <b>BDL</b> | -1.6 | -1.0       | -1.0       | +1.1       | -1.5       | <b>BDL</b> | <b>BDL</b> | +1.1  | +1.1  | +1.0  | +1.2  | -1.6       | +1.5       | +1.2  | <b>BDL</b> | +1.7       | +1.3  | -1.3  | -1.1  | +2.2  | -1.8  | +1.6  | +1.8  |        |      |
|          |         | P5A-3C8   | +1.0       | +2.2       | <b>BDL</b> | <b>BDL</b> | +1.2 | -1.1       | +1.2       | +1.1       | +2.0       | -24.9      | <b>BDL</b> | +1.4  | +1.3  | +1.4  | +1.5  | +1.0       | -1.0       | +1.4  | -1.8       | <b>BDL</b> | +2.4  | +1.7  | +1.2  | -1.0  | +1.4  | +1.3  | +1.5  | +1.5   |      |
|          |         | P22A-1D1  | +1.0       | +4.4       | <b>BDL</b> | <b>BDL</b> | -1.2 | +1.2       | +1.5       | +1.3       | -1.8       | <b>BDL</b> | <b>BDL</b> | -1.0  | -5.0  | +1.5  | -1.1  | +1.7       | +2.3       | +4.4  | +7.1       | <b>BDL</b> | +2.1  | +1.0  | -1.0  | +1.2  | +3.1  | -1.0  | +1.8  | +2.1   |      |
|          |         | BD368-2   | +1.0       | +1.3       | <b>BDL</b> | <b>BDL</b> | -1.9 | -2.1       | -1.4       | -2.1       | -1.1       | +1.1       | -1.4       | -2.3  | -1.9  | -1.3  | +1.2  | <b>BDL</b> | +1.4       | -1.5  | -1.2       | <b>BDL</b> | -1.6  | +1.5  | -2.0  | -1.6  | +1.2  | -1.1  | -1.3  | +1.0   |      |
|          |         | P5A-1B9   | +1.0       | +1.1       | <b>BDL</b> | <b>BDL</b> | -1.8 | -1.7       | -1.4       | -1.5       | +1.5       | +1.7       | -1.1       | -1.3  | -1.3  | -1.1  | +1.1  | <b>BDL</b> | <b>BDL</b> | +1.0  | -1.2       | <b>BDL</b> | +1.3  | -1.3  | -1.4  | -1.4  | -1.1  | -1.1  | -1.1  | -1.1   |      |
|          |         | REGN10987 | +1.0       | +2.4       | +2.0       | +3.0       | -1.1 | -1.3       | +1.2       | -1.3       | +1.2       | +1.4       | -1.1       | -26.6 | +1.1  | +1.3  | +1.5  | -1.3       | +1.2       | +1.2  | +1.8       | +1.5       | +1.1  | +1.0  | -1.3  | +1.2  | +1.8  | +1.8  | +1.3  | +1.1   | +1.0 |
|          |         | S309      | +1.0       | +2.1       | +2.1       | +4.4       | -1.1 | -1.1       | -1.2       | +1.2       | +1.2       | +2.6       | +1.5       | -1.0  | -1.1  | -1.0  | +1.9  | +1.4       | +1.2       | -1.5  | +1.2       | +1.2       | -1.6  | +1.8  | -1.1  | +1.2  | +1.4  | +1.0  | +1.6  | +1.9   |      |
|          |         | P2B-1G5   | +1.0       | +1.3       | -6.0       | +1.5       | -1.9 | -2.7       | +1.2       | -2.7       | +1.0       | +2.8       | +1.3       | +1.0  | -1.5  | -1.7  | +1.5  | -2.2       | -2.1       | -1.6  | -2.6       | -3.0       | +1.2  | -1.7  | +3.6  | -2.5  | +1.1  | -2.4  | -1.9  | +1.8   |      |
|          |         | A48       | +1.0       | <b>BDL</b> | <b>BDL</b> | -7.9       | +2.1 | +1.4       | <b>BDL</b> | +1.3       | <b>BDL</b> | +4.2       | +1.6       | -1.0  | +1.5  | +1.8  | +2.1  | +1.0       | +2.6       | +1.1  | +1.0       | +1.8       | -1.2  | +1.2  | -1.2  | -1.1  | +1.3  | +1.4  | +1.4  | +1.4   |      |
| anti-NTD | A48     | +1.0      | <b>BDL</b> | <b>BDL</b> | -7.9       | +2.1       | +1.4 | <b>BDL</b> | +1.3       | <b>BDL</b> | +4.2       | +1.6       | -1.0       | +1.5  | +1.8  | +2.1  | +1.0  | +2.6       | +1.1       | +1.0  | +1.8       | -1.2       | +1.2  | -1.2  | -1.1  | +1.3  | +1.4  | +1.4  | +1.4  |        |      |

**B**

|                  |         | WT        | Variants |       |        |        |      |      |       |      |        |       |       |      |       |      | NTD  | RRB    | S245C |      |      |        | S2   |      |      |      |      |      |      |      |
|------------------|---------|-----------|----------|-------|--------|--------|------|------|-------|------|--------|-------|-------|------|-------|------|------|--------|-------|------|------|--------|------|------|------|------|------|------|------|------|
| anti-RBD         | Class I | REGN10933 | +1.0     | +1.7  | +3.9   | -3.7   | -1.6 | -1.3 | -2.6  | +1.1 | -1.9   | +1.1  | -1.0  | -1.5 | -50.9 | -1.3 | +1.6 | -1.5   | -2.6  | -1.2 | -1.3 | -5.1   | +1.0 | -1.6 | +1.2 | -1.6 | -2.0 | +1.1 | -1.3 | -1.2 |
|                  |         | CB6       | +1.0     | +1.8  | +2.6   | -18.7  | -1.7 | -1.2 | -2.6  | +1.2 | -1.8   | -24.9 | -13.8 | -1.6 | -1.5  | -1.3 | -1.8 | -2.0   | -1.2  | -1.2 | -1.3 | -28.5  | +1.2 | -1.8 | +1.5 | -1.4 | -1.6 | +1.4 | -1.2 | -1.5 |
|                  |         | P2C-1F11  | +1.0     | +2.5  | +1.2   | +2.6   | -1.8 | -1.2 | -2.7  | +1.1 | -2.1   | +1.7  | +1.9  | -1.8 | -2.3  | -1.5 | -1.9 | -2.4   | -1.4  | -1.6 | -1.5 | +1.2   | +1.2 | -2.1 | +1.5 | -1.6 | -2.0 | +1.5 | -1.5 | -1.4 |
|                  |         | P5A-1D2   | +1.0     | +1.8  | -19.6  | -3.6   | -1.5 | -1.0 | -2.8  | +1.0 | -1.6   | -16.4 | -12.9 | -1.1 | -1.5  | -1.1 | -1.2 | -1.4   | -2.0  | -1.2 | +1.1 | -17.8  | +1.9 | -3.0 | +2.0 | +1.0 | -1.5 | +1.9 | -1.1 | -1.3 |
|                  |         | P5A-3C8   | +1.0     | +3.3  | -5.5   | -2.9   | -1.8 | -1.1 | -2.8  | +1.4 | -1.7   | -1.3  | -3.0  | -1.8 | -1.9  | -1.3 | -1.8 | -1.9   | -1.6  | -1.4 | +1.1 | -4.4   | +1.4 | -1.9 | +1.5 | -1.4 | +1.6 | +1.8 | -1.3 | +1.2 |
|                  |         | P22A-1D1  | +1.0     | +1.0  | -35.7  | -16.2  | -2.3 | -1.3 | -3.8  | -1.2 | -2.1   | -29.3 | -27.4 | -1.5 | -1.6  | -1.4 | -1.6 | -1.5   | -1.3  | -1.4 | -1.8 | -38.8  | +1.3 | -3.2 | +1.7 | -1.1 | +1.3 | +1.4 | -1.1 | -1.2 |
|                  |         | BD368-2   | +1.0     | +1.4  | -134.4 | -162.1 | -1.5 | -1.2 | -2.0  | +1.3 | -1.3   | -1.0  | +1.2  | -1.5 | -1.4  | -1.3 | -1.5 | -589.4 | -1.2  | -1.3 | -1.3 | -221.5 | -1.3 | -1.4 | +1.1 | -1.3 | -1.1 | -1.1 | -1.1 | -1.1 |
|                  |         | P5A-1B9   | +1.0     | +1.5  | +8.2   | -20.5  | -1.5 | -1.2 | -2.0  | +1.3 | -1.3   | -1.0  | +1.2  | -1.5 | -1.6  | -1.4 | +1.5 | +82.2  | +7.9  | -1.3 | -1.3 | -34.9  | -1.2 | -1.5 | +1.1 | -1.3 | +1.0 | +1.0 | +1.0 | +1.0 |
|                  |         | REGN10987 | +1.0     | +1.4  | +1.1   | +1.4   | -1.5 | -1.2 | -2.0  | +1.3 | -1.3   | -1.1  | +1.2  | -1.7 | -1.5  | -1.4 | -1.5 | -1.2   | -1.3  | -1.3 | -1.3 | -1.0   | -1.3 | -1.6 | +1.1 | -1.3 | -1.1 | -1.1 | -1.1 | +1.0 |
|                  |         | S309      | +1.0     | +1.1  | +1.9   | -1.1   | -1.7 | -1.2 | -2.0  | +1.1 | -1.1   | +1.0  | +1.1  | -1.4 | -1.7  | -1.5 | -1.6 | +1.2   | -1.3  | -1.4 | -1.2 | +1.8   | -1.5 | -1.6 | +1.2 | -1.3 | -1.7 | -1.3 | -1.2 | +1.0 |
|                  |         | P2B-1G5   | +1.0     | +2.3  | +3.2   | -1.5   | -1.9 | -1.2 | -1.6  | +1.0 | -1.5   | +1.4  | +2.0  | -1.0 | -1.5  | -1.2 | -1.5 | -3.2   | -1.1  | -1.1 | -1.4 | -2.1   | +1.5 | +1.9 | +2.4 | -1.3 | +1.8 | +2.4 | +1.0 | +1.0 |
|                  |         | A48       | +1.0     | +35.4 | +109.0 | -1.8   | -1.0 | +1.1 | +69.2 | +1.1 | +746.0 | -1.0  | +1.2  | -1.3 | -1.4  | -1.5 | +1.5 | -1.2   | -1.3  | -1.2 | -1.1 | +1.0   | -1.1 | -2.4 | +1.2 | -1.1 | +1.2 | +1.1 | +1.1 | +1.2 |
| soluble receptor | ACE2    | +1.0      | +22.1    | +4.5  | +5.2   | -1.9   | +1.4 | -2.9 | -1.0  | -2.1 | -6.4   | -2.7  | +1.6  | +4.2 | +2.8  | -3.2 | -1.0 | -3.6   | +1.4  | +5.4 | +4.3 | +1.5   | -1.7 | +1.8 | -1.2 | -1.5 | +1.4 | +1.0 | +1.1 |      |

162

163 **Figure 1. Susceptibility of SARS-CoV-2 variants to mAbs neutralization and**  
164 **binding.** Values indicate the fold changes in (A) half-maximal inhibitory  
165 concentrations (IC50) and (B) mean fluorescence intensity (MFI) relative to that of WT  
166 D614G. The symbol “-” indicates increased resistance and “+” increased sensitivity.  
167 Those IC50 or MFI values highlighted in red, resistance increased at least threefold; in  
168 blue, sensitivity increased at least threefold; and in white, resistance or sensitivity  
169 increased less than threefold. BDL (Below Detection Limit) indicates the highest  
170 concentration of mAbs failed to reach 50% neutralization. Results were calculated from  
171 three independent experiments.

172

173 Of note, neutralization activities of mAbs approved for EUA (REGN10933,  
174 REGN10987 and CB6) or being studied for clinical use (P2C-1F11, BD368-2, S309,  
175 and P2B-1G5) were variably affected for pseudoviruses carrying mutations identified  
176 in the three variants and in the GISAID database (Fig. 1 and Fig. S3). The IC50 of  
177 REGN10933 dropped 13.0- and 8.2- fold against SA501Y.V2 and BR501Y.V3,  
178 respectively, largely due to the K417N/T and E484K mutations (Fig. 1A). Several  
179 mutations within the REGN10933 epitope, such as Y453F and F486L, were also  
180 associated with a substantial reduction in neutralization. N439K, located in the  
181 REGN10987 epitope, showed a 26.6-fold reduction in IC50. The most dramatically  
182 impacted mAb was CB6, one of the paired antibodies developed by Eli Lilly and  
183 approved for EUA, for which the neutralization against SA501Y.V2 and BR501Y.V3  
184 pseudoviruses was below detection limit (BDL) when the highest concentration  
185 (1µg/mL) was used. The reduction and loss of neutralization are largely attributed to



186 K417N/T (Fig. 1A). Interestingly, despite being a Class I or RBS-A antibody, P2C-1F11  
187 was virtually unaffected by the mutations, as were the Class III and IV anti-RBD mAbs  
188 REGN10987, S309, and P2B-1G5 (Fig. 1A).

189

190 Next, we studied the binding avidity of the 12 mAbs to the 28 mutant S proteins  
191 expressed on cell surfaces. There was a strong correlation between neutralization and  
192 binding avidity (Fig. 1B and Fig. S4), indicating that compromised binding avidity is a  
193 major escape mechanism. Lastly, soluble human ACE2 appeared to improve binding to  
194 all three variants, as well as pseudoviruses bearing single N501Y and triple K417N-  
195 E484K-N501Y mutations (Fig. 1B, and Fig. S4). This finding indicates that N501Y  
196 plays a role in enhanced binding, which is consistent with earlier reports on both human  
197 and mouse ACE2 (39, 40, 50, 51). The single K417N mutation, however, decreased  
198 ACE2 binding by about 6.4-fold. Taken together, these results indicate that the NTD  
199 mutations Y144del and 242-244del and RBD mutations K417N/T, E484K, and N501Y  
200 confer substantial mAb resistance. The mAbs studied here with EUA would need to be  
201 optimized for the best efficacy possible against new variants.

202

203 **Structural basis for mAb neutralization and escape.** We next studied the structural  
204 basis for P2C-1F11 able to maintain neutralization to the variants despite being in the  
205 Class I or RBS-A anti-RBD antibody. We determined the crystal structure of the SARS-  
206 CoV-2 RBD carrying K417N-E484K-N501Y mutations (RBD-3M) bound by P2C-  
207 1F11 at a resolution of 2.10 Å (PDB ID: 7E8M) (Table S1). Comparing with our  
208 previously reported the crystal structure of the wildtype RBD with P2C-1F11 at 3.0 Å  
209 (PDB ID:7CDI), we found the three mutations did not change the overall binding mode  
210 of P2C-1F11 to the RBD (Fig. 2A), as evidenced by 0.52 Å rmsd value for all 581 Ca

211 atoms. However, a couple of subtle changes were identified. One is related to the  
212 interactive forces with residues 417 and the other with residue at 501. Like other Class  
213 I and RBS-A antibodies, P2C-1F11 binds to the wildtype K417 through hydrophobic  
214 and hydrogen-bond interactions. This is largely mediated by its heavy chain germline  
215 residue Y33 and Y52 (43). The K417N mutation would diminish these interactions but  
216 only replaced by one hydrogen bond between Y52 and mutant N417 (Fig. 2B and Table  
217 S2). Furthermore, unlike those in Class I or RBS-A, P2C-1F11 does not form salt-  
218 bridge interaction between aspartic acid (D) and K417 (Fig. 2B and 2C). The K417N  
219 mutation would therefore be less disruptive to P2C-1F11 than to those in the Class I or  
220 RBS-A such as P5A-1D2, P22A-1D1, CB6 studied here and CC12.1, CC12.3, COVA2-  
221 04 and COVA2-07 characterized elsewhere (37, 43, 44).

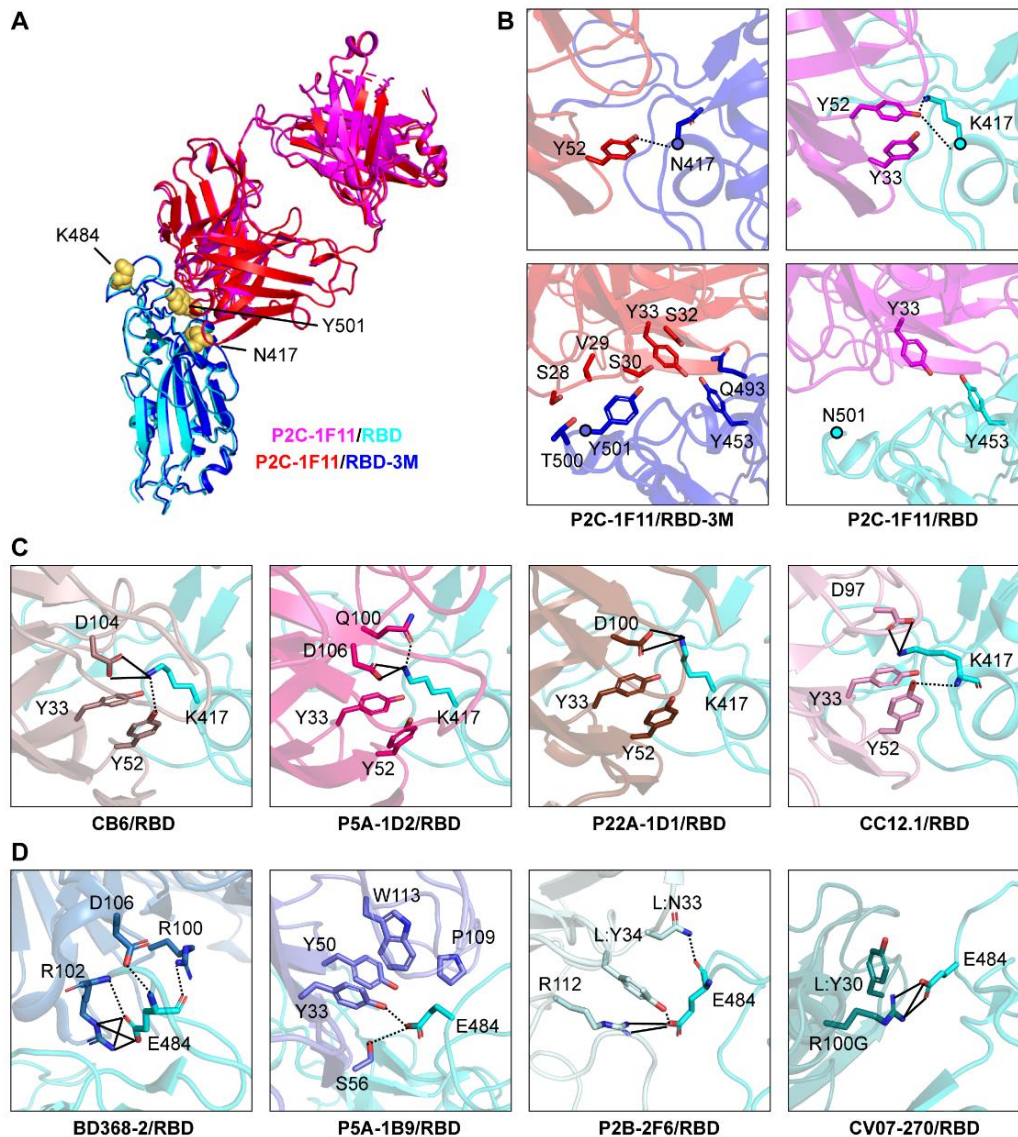

222

223 **Figure 2. Structural basis for mAb neutralization and escape.** (A) P2C-1F11/RBD-  
 224 3M crystal structure superposed onto P2C-1F11/RBD crystal structure (PDB: 7CDI).  
 225 P2C-1F11 is colored with magenta and RBD is colored with cyan in the P2C-1F11/RBD  
 226 complex. The P2C-1F11 and RBD-3M are colored with red and blue respectively in the  
 227 P2C-1F11/RBD-3M complex. The three RBD-3M mutated residues (N417, K484, and  
 228 Y501) are shown as yellow-colored spheres. (B) Interactions with P2C-1F11 around  
 229 RBD-3M N417 and Y501 (left panel) and wildtype RBD K417 and N501 (right panel).  
 230 (C) Interactions between K417 and representative Class I IGHV3-53/3-66 antibodies  
 231 CB6, P5A-1D2, P22A-1D1 and CC12.1. (D) Interactions between E484 and Class II  
 232 antibodies BD368-2, P5A-1B9, P2B-2F6 and CV07-270. For panel (C) and (D),  
 233 antibodies are shown with different colors; hydrogen bond and salt bridge are  
 234 represented by dashed and black lines, respectively. CB6/RBD (PDB: 7C01), P5A-  
 235 1D2/RBD (PDB: 7CHO), P22A-1D1/RBD (PDB: 7CHS), CC12.1/RBD (PDB: 6XC2),  
 236 BD368-2/RBD (PDB: 7CHC), P5A-1B9 (PDB: 7CZX), P2B-2F6 (PDB: 7BWJ),  
 237 CV07-270 (PDB:6XKP).

238

239 Structural analysis further showed that the P2C-1F11 light chain had extensive  
240 interactions with RBD-3M residues Y453, Q493, T500 and Y501 around the 501  
241 position but had much less with the wildtype RBD residue asparagine (N) at the 501  
242 (Fig. 2B and Table S2). The extra interactions between RBD-3M and P2C-1F11 around  
243 the Y501 may also contribute to the retained binding and neutralization of P2C-1F11  
244 against SARS-CoV-2 variants carrying the triple K417N-E484K-N501Y mutation.

245

246 Like to the wildtype RBD, P2C-1F11 does not directly bind to E484K in the RBD-3M  
247 (Fig. 2B and Table S2). This explains E484K had no detectable impact on binding and  
248 neutralizing activity of P2C-1F11. However, the E484K mutation resulted in the  
249 complete loss of BD368-2 and P5A-1B9 neutralization (Fig. 1). Structural analysis  
250 showed that the E484 forms salt-bridge and/or hydrogen-bonding interactions with  
251 BD368-2, P5A-1B9, P2B-2F6 and CV07-270 (Fig. 2D) (3, 41, 42, 44). Therefore, the  
252 E484K mutation would diminish such interaction and render this class of antibodies  
253 ineffective against the SA501Y.V2 and BR501Y.V3.

254

### 255 **Susceptibility of SARS-CoV-2 variants to neutralization by convalescent plasma.**

256 We next studied the degree to which major variant pseudoviruses confer resistance to  
257 convalescent plasma from SARS-CoV-2 infected individuals. The plasma samples were  
258 collected from 23 patients during the early wave of the pandemic between January and  
259 February of 2020. Twelve of these patients had only mild symptoms and 11 developed  
260 severe disease. The average age was 56 with a range of 29 to 81 years old. Thirteen  
261 were men and 10 were women. For each plasma sample, eight serial dilutions were  
262 made starting from either 1:60 or 1:200 and neutralization activity was estimated based

263 on half-maximal inhibitory dilution (ID50) and -fold changes relative to that against  
264 WT D614G pseudovirus (Fig. 3, and Fig. S5). Consistent with the findings for mAbs,  
265 SA501Y.V2 and BR501Y.V3 pseudoviruses demonstrated more resistance than  
266 UK501Y.V1 both in absolute ID50 (Fig. 3A and 3B) and -fold changes (Fig. 3B)  
267 relative to WT D614G. The average reductions in neutralization activity across the 23  
268 plasma samples were at least 6.9-fold against SA501Y.V2, 2.4-fold against BR501Y.V3,  
269 and no significant reduction against UK501Y.V1 pseudoviruses (Fig. 3A). A complete  
270 loss in neutralization activity, indicated by below the detection limit (BDL) in Fig. 3C,  
271 was observed for 11 plasma samples against pseudovirus SA501Y.V2, four against  
272 BR501Y.V3, and none against UK501Y.V1. The remaining plasma demonstrated  
273 varying degree of reduction in neutralization potency.

274

275 Examination of the resistance patterns across the single and triple mutant pseudoviruses  
276 revealed some notable patterns. In particular, the 242-244del mutation in the NTD  
277 reduced the neutralization activity more than 2-fold for C-Plasma1, C-Plasma5, C-  
278 Plasma7, C-Plasma8, and C-Plasma9, which correlates with the reduction or loss in  
279 potency observed against SA501Y.V2 pseudoviruses (Fig. 3C). The NTD supersite  
280 antibodies are likely to account for such significant reduction (46, 48, 49). On the other  
281 hand, the single mutant E484K and triple mutant K417N-E484K-N501Y pseudoviruses  
282 significantly reduced the neutralization activity for eight plasma samples (C-Plasma6,  
283 C-Plasma10, C-Plasma15, C-Plasma16, C-Plasma17, C-PlasmaP#2, C-PlasmaP#5, and  
284 C-PlasmaP#22), which corresponds with their diminished or loss of neutralization  
285 against SA501Y.V2 and BR501Y.V3 pseudoviruses. Antibodies targeting the receptor  
286 binding motif (RBM) likely contributed to such changes (Fig. 3C). In contrast, for  
287 pseudoviruses carrying only the K417N mutant, neutralization efficacy invariably

288 increased for all plasma sample studied with an average 2.0-fold improvement. Similar  
 289 trend was also noticed for pseudoviruses carrying only the K417T mutant (Fig. 3C).  
 290 The single mutant N501Y pseudovirus, previously reported to enhance ACE2 binding  
 291 (39, 40, 52), had limited effects on neutralizing activity of convalescent plasma.

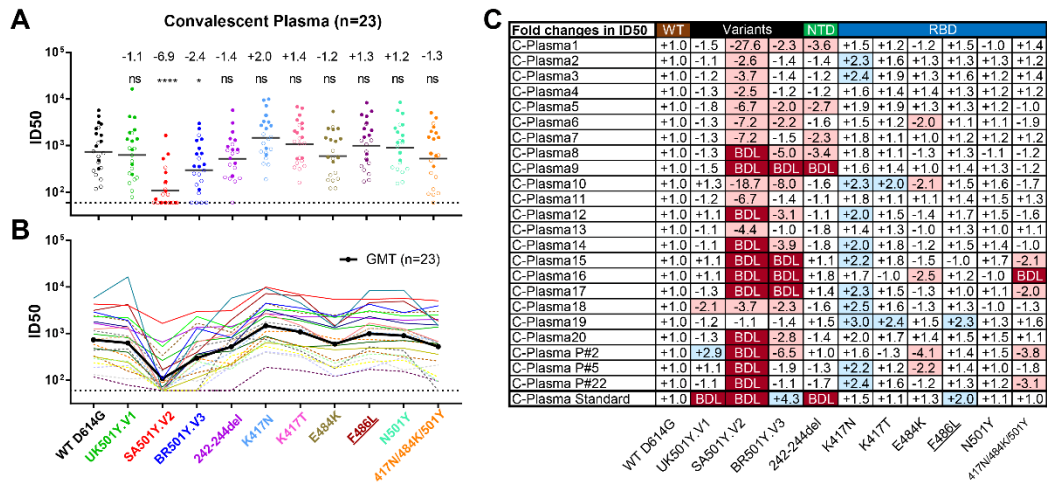

292

293 **Figure 3. Susceptibility of SARS-CoV-2 variants to convalescent plasma**  
 294 **neutralization.** Reciprocal plasma dilutions (*ID50*) against SARS-CoV-2 variants  
 295 were shown either by (A) colored dots or (B) colored curves, each of which represent  
 296 a different convalescent plasma. The geometric mean against each variant is indicated  
 297 by a back horizontal line in (A) and back curve (B). Plasma samples from mild and  
 298 severe patients are indicated by empty or solid circle in (A), and dashed or solid curve  
 299 in (B). The fold change in *ID50* between mutant and WT D614G pseudoviruses are  
 300 shown by overall average at the top in (A) or individually in (C). The symbol “-”  
 301 indicates an increase in resistance while the symbol “+” indicates an increase in  
 302 sensitivity. In (C), red highlights indicate a minimum twofold increase in resistance;  
 303 blue a minimum twofold increase in sensitivity; and white a less than twofold change  
 304 in either resistance or sensitivity. BDL (Below Detection Limit) indicates the highest  
 305 concentration of plasma (1:60) failed to confer 50% neutralization. Standard plasma  
 306 was obtained from the NIBSC (code: 20/136). Results were calculated from three  
 307 independent experiments. \*: P<0.05; and \*\*\*: P<0.0001. ns: not significant.

308

309 Lastly, the plasma standard (code: 20/136) obtained from the NIBSC (United Kingdom)  
 310 failed to neutralize UK501Y.V1 and SA501Y.V2 pseudoviruses, which correlates with  
 311 the loss of efficacy against the 242-244del pseudovirus (Fig. 3C). This suggests that

312 anti-NTD antibodies account for a major proportion of neutralizing activity in this  
313 sample. Collectively, these results indicate that SA501Y.V2 was the most resistant  
314 pseudovirus against the convalescent plasma tested, followed by BR501Y.V3 and then  
315 UK501Y.V1. The loss of plasma neutralizing activities is attributed, in varying degrees,  
316 to the 242-244del in the NTD, E484K, and triple K417N-E484K-N501Y mutations in  
317 the RBD, depending on individual plasma. Different convalescent plasma appears to  
318 respond differently to the mutated pseudoviruses, perhaps reflecting the different  
319 compositions and proportions of neutralizing antibodies in each individual generated  
320 during natural infection.

321

322 **Enhanced entry of SARS-CoV-2 variants through mouse and mink ACE2.** To study  
323 the potential impact of SARS-CoV-2 variants on host range and cross-species  
324 transmission, we characterized the ability of ACE2 from nine host species to support  
325 the entry of 28 SARS-CoV-2 mutant pseudoviruses. HeLa cell lines stably expressing  
326 the ACE2 molecules were subjected to infection. The entry efficiency was measured  
327 and presented as fold-change relative to WT D614G. As shown in Fig. 4, the three  
328 variants UK501Y.V1, SA501Y.V2, and BR501Y.V3 gained substantial ability to infect  
329 HeLa mouse-ACE2, which correlated with those pseudoviruses bearing single (K417N,  
330 K417T, E484K, and N501Y) and triple (K417N-E484K-N501Y) mutations. This  
331 agrees well with the recent reports where either single N501Y or triple K417N-Q493H-  
332 N501Y mutations were found in the mouse-adapted SARS-CoV-2 strains, although the  
333 triple mutant causes more severe acute respiratory symptoms and mortality in standard  
334 laboratory mice (50, 51). Single N501Y mutation found in UK501Y.V1 and two of three  
335 (K417N and N501Y) found in SA501Y.V2 and BR501Y.V3 therefore likely enhanced  
336 the binding to mouse ACE2 thereby improved entry efficiency into HeLa mouse-ACE2.

| Fold changes in entry | WT   | UK501Y.V1 | SA501Y.V2 | BR501Y.V3 | L18F | 69-70del | Y144del | A222V | 242-244del | K417N | K417T | N539K | Y453F | S271N | L472I | E484K | E486L | S494P | N501Y | A177M&N501Y | A570D | E683D | H655Y | P681H | T716I | S802A | D1118H | D1162Y |
|-----------------------|------|-----------|-----------|-----------|------|----------|---------|-------|------------|-------|-------|-------|-------|-------|-------|-------|-------|-------|-------|-------------|-------|-------|-------|-------|-------|-------|--------|--------|
|                       | WT   | Variants  |           |           |      | NTD      |         |       |            | RBD   |       |       |       |       |       |       |       |       |       |             |       |       |       |       |       |       |        |        |
| HeLa Human-ACE2       | +1.0 | -6.6      | -1.0      | -1.9      | +1.5 | +1.9     | -1.6    | -2.4  | -3.4       | -1.3  | +1.2  | -3.6  | -2.0  | -1.4  | -3.2  | -2.3  | -1.5  | -1.8  | -3.6  | -1.8        | -2.0  | -3.6  | -1.3  | -1.7  | -10.6 | -2.5  | -1.1   | -2.4   |
| HeLa Erbat-ACE2       | +1.0 | -3.8      | +1.3      | -1.3      | +2.4 | +2.6     | -1.0    | -1.4  | -5.8       | -97.1 | -38.4 | -1.9  | -4.0  | -1.0  | -3.1  | -1.7  | +2.0  | -1.3  | -1.4  | -1.7        | +1.1  | -3.5  | +1.6  | -1.6  | -16.5 | -3.8  | -1.2   | -2.3   |
| HeLa Rsbat-ACE2       | +1.0 | -5.5      | -37.8     | -79.4     | +1.6 | +1.8     | -2.0    | -1.9  | -8.7       | -2.1  | -1.5  | -3.4  | -2.5  | -1.3  | -2.9  | -8.8  | -1.7  | -1.5  | -3.8  | -186.6      | 1.8   | -3.3  | +1.1  | -1.7  | -11.4 | -2.4  | -1.1   | -2.7   |
| HeLa Pangolin-ACE2    | +1.0 | -8.5      | -1.2      | -1.5      | +1.8 | +2.4     | -2.0    | -2.0  | -2.6       | -1.0  | +1.3  | -3.0  | -1.8  | -1.2  | -2.3  | -2.2  | -1.1  | -1.3  | -2.6  | -2.0        | -1.9  | -3.1  | +1.3  | -1.8  | -9.8  | -1.7  | +1.1   | -2.2   |
| HeLa Pig-ACE2         | +1.0 | -8.2      | -1.3      | -2.6      | +1.3 | +1.7     | -2.2    | -2.3  | -3.0       | -1.2  | +1.0  | -3.5  | -2.2  | -1.5  | -2.7  | -2.4  | -1.1  | -1.8  | -3.4  | -2.3        | -2.1  | -3.7  | -1.2  | -1.9  | -12.1 | -2.2  | -1.1   | -2.4   |
| HeLa Cat-ACE2         | +1.0 | -5.3      | -1.1      | -2.3      | +1.0 | +1.1     | -3.7    | -2.5  | -1.9       | +1.1  | +1.1  | -4.0  | -2.7  | -1.7  | -3.1  | -1.5  | -1.5  | -1.5  | -3.3  | -1.9        | -2.5  | -2.6  | -1.2  | -2.2  | -11.0 | -2.0  | -1.1   | -1.8   |
| HeLa Dog-ACE2         | +1.0 | -6.1      | -1.2      | -2.4      | +1.1 | +1.1     | -3.9    | -2.9  | -1.9       | +1.1  | +1.0  | -4.7  | -2.9  | -2.0  | -3.6  | -1.6  | -1.7  | -1.6  | -3.8  | -2.8        | -2.9  | -2.6  | -1.3  | -2.3  | -10.0 | -1.8  | -1.1   | -1.9   |
| HeLa Mink-ACE2        | +1.0 | -1.2      | +10.0     | +4.3      | -1.3 | +2.9     | -11.3   | -1.4  | -4.9       | -2.8  | -14.5 | +2.3  | +21.9 | +1.0  | -3.8  | +26.6 | +31.7 | +4.0  | +3.5  | +3.0        | +1.8  | -4.3  | +1.7  | -2.3  | -11.3 | -5.2  | +1.1   | -2.3   |
| HeLa Mouse-ACE2       | +1.0 | +26.6     | +108.0    | +71.7     | +1.6 | +3.8     | +1.5    | -1.4  | -12.7      | +23.1 | +32.0 | -9.7  | -3.5  | -1.3  | -2.4  | +24.0 | +2.6  | +3.0  | +41.5 | +44.7       | +2.1  | -4.7  | +1.2  | -1.3  | -17.3 | -5.8  | -1.0   | -3.5   |

337

338 **Figure 4. Entry efficiency of SARS-CoV-2 variants into HeLa cells expressing**  
 339 **ACE2 from diverse host species.** The values show the fold changes in luciferase  
 340 activity for each indicated mutant pseudovirus variant compared to WT D614G. The  
 341 symbol “+” indicates an increase in entry efficiency, while “-” indicates a decrease. Red  
 342 highlights indicate at least threefold increase in efficiency; blue indicates at least  
 343 threefold decrease in efficiency, while white indicates no change greater than threefold.  
 344 Results were calculated from three independent experiments.

345

346 Interestingly, the single mutant E484K pseudovirus also enhanced the entry into both  
 347 HeLa mouse-ACE2 and HeLa mink-ACE2. Such enhancement was correlated only  
 348 with the E484K-bearing variant SA501Y.V2 and BR501Y.V3 but not with E484K-  
 349 missing variant UK501Y.V1, suggesting the added and/or synergistic effect of E484K  
 350 with other mutant residues in facilitating entry into these two cell lines. Furthermore,  
 351 two single mutant pseudoviruses Y453F and F486L also substantially improved the  
 352 entry efficiency. The two very mutations have recently been found among the mink-  
 353 associated SARS-CoV-2 circulating in mink farms in Denmark, suggesting their critical  
 354 role in adaptation and transmission among the mink population (53). Taken together,  
 355 these results indicate that the three variants, particularly SA501Y.V2, and BR501Y.V3,  
 356 acquired mutations in RBD that not only facilitate their escape from antibody  
 357 neutralization but also potentially expand their host range to mouse and mink. Active  
 358 surveillance of these variants in both human and relevant animal species would be  
 359 required to minimize potential cross-species transmission.

360

361



## 362 **Discussion**

363

364 In this study, we systematically evaluated the impact of mutations found in emerging  
365 SARS-CoV-2 variants UK501Y.V1, SA501Y.V2 and BR501Y.V3, as well as some  
366 single mutations within or close by the major antigenic sites in the spike protein  
367 identified in the GISAID database. We identified K417N, E484K, and N501Y  
368 mutations in the three variants that have profound consequences on antibody  
369 neutralization and interaction with mouse and mink ACE2, although mutations in NTD  
370 also impacted on antibody neutralization. It needs to be noted that our entry studies  
371 conducted on ectopically expressed mouse and mink ACE2 does not necessarily equal  
372 natural infection and transmission in the corresponding animals. However, the same  
373 K417N and/or N501Y mutations found in mouse adapted SARS-CoV-2 should raise  
374 enough concern about the potential spread of these new variants to mice and beyond.  
375 Indeed, recently identified SARS-CoV-2 variants in the mink farm in Denmark has  
376 raised another warning sign about the complexity of host range and cross-species  
377 transmission of SARS-CoV-2 variants. Rigorous and thorough monitoring of relevant  
378 animals would be required to better understand such complexity and to prevent future  
379 outbreaks.

380

381 Among the three variants, SA501Y.V2 is the most resistant against mAbs and  
382 convalescent plasma, followed by BR501Y.V3 and then UK501Y.V1. This resistance  
383 hierarchy corresponds well with genetic mutations in the NTD and RBD that led to the  
384 major antigenic changes in the spike protein. Particularly, SA501Y.V2 has both the  
385 NTD supersite mutation (242-244del) and triple K417N-E484K-N501Y RBD mutation,  
386 whereas BR501Y.V3 has only the latter and UK501Y.V1 only the former (Y144del)

387 together with N501Y in RBD (Fig. S1). The impact of these mutations in conferring  
388 antibody resistance clearly indicates NTD and RBD are major antigenic domains on the  
389 S protein. Further study is needed to precisely estimate the relative contributions of  
390 RBD-directed and NTD-directed neutralizing antibodies to overall plasma neutralizing  
391 activity. Up till now, the most potent mAbs isolated from infected and vaccinated  
392 individuals were often dominated by those targeting the RBD and many isolated NTD  
393 mAbs failed to reach 100% potency in neutralizing activity (3-6, 8, 46, 48, 54). These  
394 results clearly point to greater impact of RBD antibodies in overall plasma  
395 neutralization. Nevertheless, new SARS-CoV-2 variants with an increasing number of  
396 mutations in both the NTD and RBD will challenge the efficacy of mAb therapies and  
397 vaccines.

398

399 The impacts of these mutations, in terms of mAbs, are crystal clear. SA501Y.V2 and  
400 BR501Y.V3 are resistant to neutralization by many anti-RBD and anti-NTD antibodies,  
401 including two (CB6 and REGN10933) already approved for EUA (13, 54-56). Most  
402 Class I mAbs studied here were disrupted by the K417N/T mutation while those in  
403 Class II by the E484K mutation. Of note, we observed that the single K417N/Y mutant  
404 tended to increase, rather than decrease, the neutralizing activity of non-Class I mAbs.  
405 As K417N/T also markedly reduced binding to soluble ACE2, this mutation may shift  
406 the balance in favor of antibody binding rather than ACE2 binding. Similar findings  
407 were also found for convalescent plasma. More importantly, P2C-1F11 currently in  
408 therapeutic development was virtually unaffected by either the single K417N/T or the  
409 triple K417N-E484K-N501Y mutation. The ability of Y52 in its heavy chain to  
410 maintain hydrogen bond with the mutant N417 while gathering more interactive forces  
411 around mutant Y501 provides the plausible structural explanations (Fig. 2 and Table

412 S2). Considering that most Class I antibodies with heavy chain IGHV3-53/3-66 usage  
413 lost efficacy against the K417N mutation, the P2C-1F11 findings shows existence of  
414 Class I antibodies that are not affected by the mutation. This offers hope for inducing  
415 P2C-1F11-like antibodies by vaccine that can maintain strong, broadly neutralizing  
416 activity against wide range of variants, including SA501Y.V2 and BR501Y.V3.

417

418 For convalescent plasma, the most profound impact was observed on the SA501Y.V2  
419 pseudovirus, followed BR501Y.V3 and then UK501Y.V1. The reduction or complete  
420 loss of neutralization activities were variably attributed to the 242-244del mutation in  
421 the NTD, E484K, and triple K417N-E484K-N501Y in the RBD, depending on  
422 individual profile of neutralizing antibodies. Similar reductions in the neutralization of  
423 SA501Y.V2 have also been reported elsewhere in recovered patients and individuals  
424 vaccinated with either mRNA or inactivated vaccines approved under EUA (13, 54-56).  
425 Although the specific levels of neutralizing antibody required to confer protection  
426 remains uncertain, reductions in antibody titers raises concerns about their protective  
427 potentials against emerging variants, particularly SA501Y.V2. Indeed, reduction in  
428 patient antibody titers have been associated with an increased likelihood of re-infection  
429 (57). Recent vaccine trials in South Africa showed reduced efficacy against SA501Y.V2,  
430 but maintained efficacy against wildtype strains like Wuhan-Hu-1 (58-60). Taken  
431 together, these results clearly demonstrate that antigenic shifts are occurring among  
432 emerging SARS-CoV-2 variants. This calls for the immediate reevaluation and update  
433 of mAb therapies and vaccines. In the long run, the goal is to develop universal  
434 therapeutic and preventive interventions that maintain efficacy against all strain  
435 mutations. Until that day comes, control over the emergence of new variants requires  
436 accelerated vaccine rollouts and ardent practice of proven public health measures.

437 **References and Notes**

438

- 439 1. P. Zhou *et al.*, A pneumonia outbreak associated with a new coronavirus of  
440 probable bat origin. *Nature* **579**, 270-273 (2020).
- 441 2. D. Pinto *et al.*, Cross-neutralization of SARS-CoV-2 by a human monoclonal  
442 SARS-CoV antibody. *Nature* **583**, 290-295 (2020).
- 443 3. B. Ju *et al.*, Human neutralizing antibodies elicited by SARS-CoV-2 infection.  
444 *Nature* **584**, 115-119 (2020).
- 445 4. S. J. Zost *et al.*, Potently neutralizing and protective human antibodies against  
446 SARS-CoV-2. *Nature* **584**, 443-449 (2020).
- 447 5. J. Hansen *et al.*, Studies in humanized mice and convalescent humans yield a  
448 SARS-CoV-2 antibody cocktail. *Science* **369**, 1010-1014 (2020).
- 449 6. D. F. Robbiani *et al.*, Convergent antibody responses to SARS-CoV-2 in  
450 convalescent individuals. *Nature* **584**, 437-442 (2020).
- 451 7. Y. Cao *et al.*, Potent Neutralizing Antibodies against SARS-CoV-2 Identified by  
452 High-Throughput Single-Cell Sequencing of Convalescent Patients' B Cells.  
453 *Cell* **182**, 73-84.e16 (2020).
- 454 8. L. Liu *et al.*, Potent neutralizing antibodies against multiple epitopes on SARS-  
455 CoV-2 spike. *Nature* **584**, 450-456 (2020).
- 456 9. S. Wu *et al.*, A single dose of an adenovirus-vectored vaccine provides  
457 protection against SARS-CoV-2 challenge. *Nat Commun* **11**, 4081 (2020).
- 458 10. K. S. Corbett *et al.*, Evaluation of the mRNA-1273 Vaccine against SARS-CoV-

- 459 2 in Nonhuman Primates. *N Engl J Med* **383**, 1544-1555 (2020).
- 460 11. H. Wang *et al.*, Development of an Inactivated Vaccine Candidate, BBIBP-CorV,  
461 with Potent Protection against SARS-CoV-2. *Cell* **182**, 713-721 e719 (2020).
- 462 12. A. B. Vogel *et al.*, BNT162b vaccines protect rhesus macaques from SARS-  
463 CoV-2. *Nature*, (2021).
- 464 13. FDA, Coronavirus Disease 2019 (COVID-19) EUA Information.  
465 [https://www.fda.gov/emergency-preparedness-and-response/mcm-legal-](https://www.fda.gov/emergency-preparedness-and-response/mcm-legal-regulatory-and-policy-framework/emergency-use-authorization#covid19euas)  
466 [regulatory-and-policy-framework/emergency-use-authorization#covid19euas.](https://www.fda.gov/emergency-preparedness-and-response/mcm-legal-regulatory-and-policy-framework/emergency-use-authorization#covid19euas)  
467 (2021).
- 468 14. R. L. Gottlieb *et al.*, Effect of Bamlanivimab as Monotherapy or in Combination  
469 With Etesevimab on Viral Load in Patients With Mild to Moderate COVID-19:  
470 A Randomized Clinical Trial. *JAMA* **325**, 632-644 (2021).
- 471 15. D. M. Weinreich *et al.*, REGN-COV2, a Neutralizing Antibody Cocktail, in  
472 Outpatients with Covid-19. *N Engl J Med* **384**, 238-251 (2021).
- 473 16. P. Chen *et al.*, SARS-CoV-2 Neutralizing Antibody LY-CoV555 in Outpatients  
474 with Covid-19. *N Engl J Med* **384**, 229-237 (2021).
- 475 17. R. Shi *et al.*, A human neutralizing antibody targets the receptor-binding site of  
476 SARS-CoV-2. *Nature* **584**, 120-124 (2020).
- 477 18. L. R. Baden *et al.*, Efficacy and Safety of the mRNA-1273 SARS-CoV-2  
478 Vaccine. *New England Journal of Medicine* **384**, 403-416 (2021).
- 479 19. F. P. Polack *et al.*, Safety and Efficacy of the BNT162b2 mRNA Covid-19  
480 Vaccine. *N Engl J Med* **383**, 2603-2615 (2020).

- 481 20. J. Johnson, Johnson & Johnson COVID-19 Vaccine Authorized by U.S. FDA  
482 For Emergency Use - First Single-Shot Vaccine in Fight Against Global  
483 Pandemic. [https://www.jnj.com/johnson-johnson-covid-19-vaccine-](https://www.jnj.com/johnson-johnson-covid-19-vaccine-authorized-by-u-s-fda-for-emergency-usefirst-single-shot-vaccine-in-fight-against-global-pandemic)  
484 [authorized-by-u-s-fda-for-emergency-usefirst-single-shot-vaccine-in-fight-](https://www.jnj.com/johnson-johnson-covid-19-vaccine-authorized-by-u-s-fda-for-emergency-usefirst-single-shot-vaccine-in-fight-against-global-pandemic)  
485 [against-global-pandemic](https://www.jnj.com/johnson-johnson-covid-19-vaccine-authorized-by-u-s-fda-for-emergency-usefirst-single-shot-vaccine-in-fight-against-global-pandemic). (2021).
- 486 21. M. Voysey *et al.*, Safety and efficacy of the ChAdOx1 nCoV-19 vaccine  
487 (AZD1222) against SARS-CoV-2: an interim analysis of four randomised  
488 controlled trials in Brazil, South Africa, and the UK. *Lancet (London, England)*  
489 **397**, 99-111 (2021).
- 490 22. Novavax, Novavax COVID-19 Vaccine Demonstrates 89.3% Efficacy in UK  
491 Phase 3 Trial. [https://ir.novavax.com/news-releases/news-release-](https://ir.novavax.com/news-releases/news-release-details/novavax-covid-19-vaccine-demonstrates-893-efficacy-uk-phase-3)  
492 [details/novavax-covid-19-vaccine-demonstrates-893-efficacy-uk-phase-3](https://ir.novavax.com/news-releases/news-release-details/novavax-covid-19-vaccine-demonstrates-893-efficacy-uk-phase-3).  
493 (2021).
- 494 23. S. Xia *et al.*, Safety and immunogenicity of an inactivated SARS-CoV-2 vaccine,  
495 BBIBP-CorV: a randomised, double-blind, placebo-controlled, phase 1/2 trial.  
496 *The Lancet Infectious Diseases* **21**, 39-51 (2021).
- 497 24. E. Callaway, Fast-spreading COVID variant can elude immune responses.  
498 *Nature* **589**, 500-501 (2021).
- 499 25. GISAID, COVID-19 Viral Genome Analysis Pipeline.  
500 <https://cov.lanl.gov/content/index>. (2021).
- 501 26. E. Volz *et al.*, Evaluating the Effects of SARS-CoV-2 Spike Mutation D614G  
502 on Transmissibility and Pathogenicity. *Cell* **184**, 64-75 e11 (2021).

- 503 27. L. Yurkovetskiy *et al.*, Structural and Functional Analysis of the D614G SARS-  
504 CoV-2 Spike Protein Variant. *Cell* **183**, 739-751 e738 (2020).
- 505 28. B. Korber *et al.*, Tracking Changes in SARS-CoV-2 Spike: Evidence that  
506 D614G Increases Infectivity of the COVID-19 Virus. *Cell* **182**, 812-827 e819  
507 (2020).
- 508 29. Y. J. Hou *et al.*, SARS-CoV-2 D614G variant exhibits efficient replication ex  
509 vivo and transmission in vivo. *Science* **370**, 1464-1468 (2020).
- 510 30. K. Kupferschmidt, Fast-spreading U.K. virus variant raises alarms. *Science* **371**,  
511 9-10 (2021).
- 512 31. P. H. England, Investigation of novel SARS-COV-2 variant: Variant of Concern  
513 202012/01. [https://www.gov.uk/government/publications/investigation-of-](https://www.gov.uk/government/publications/investigation-of-novel-sars-cov-2-variant-variant-of-concern-20201201)  
514 [novel-sars-cov-2-variant-variant-of-concern-20201201](https://www.gov.uk/government/publications/investigation-of-novel-sars-cov-2-variant-variant-of-concern-20201201). (2020).
- 515 32. H. Tegally *et al.*, Emergence and rapid spread of a new severe acute respiratory  
516 syndrome-related coronavirus 2 (SARS-CoV-2) lineage with multiple spike  
517 mutations in South Africa. *medRxiv*, 2020.2012.2021.20248640 (2020).
- 518 33. T. Fujino *et al.*, Novel SARS-CoV-2 Variant Identified in Travelers from Brazil  
519 to Japan. *Emerging infectious diseases* **27**, (2021).
- 520 34. F. Maggi *et al.*, Imported SARS-COV-2 Variant P.1 Detected in Traveler  
521 Returning from Brazil to Italy. *Emerging infectious diseases* **27**, (2021).
- 522 35. J. Lan *et al.*, Structure of the SARS-CoV-2 spike receptor-binding domain  
523 bound to the ACE2 receptor. *Nature* **581**, 215-220 (2020).
- 524 36. Rambaut, Preliminary genomic characterisation of an emergent SARS-CoV-2

- 525 lineage in the UK defined by a novel set of spike mutations.  
526 [https://virological.org/t/preliminary-genomic-characterisation-of-an-emergent-](https://virological.org/t/preliminary-genomic-characterisation-of-an-emergent-sars-cov-2-lineage-in-the-uk-defined-by-a-novel-set-of-spike-mutations/563)  
527 [sars-cov-2-lineage-in-the-uk-defined-by-a-novel-set-of-spike-mutations/563](https://virological.org/t/preliminary-genomic-characterisation-of-an-emergent-sars-cov-2-lineage-in-the-uk-defined-by-a-novel-set-of-spike-mutations/563).  
528 (2020).
- 529 37. M. Yuan *et al.*, Structural basis of a shared antibody response to SARS-CoV-2.  
530 *Science* **369**, 1119-1123 (2020).
- 531 38. C. O. Barnes *et al.*, SARS-CoV-2 neutralizing antibody structures inform  
532 therapeutic strategies. *Nature* **588**, 682-687 (2020).
- 533 39. F. Tian *et al.*, Mutation N501Y in RBD of Spike Protein Strengthens the  
534 Interaction between COVID-19 and its Receptor ACE2. *bioRxiv*,  
535 2021.2002.2014.431117 (2021).
- 536 40. C. Laffeber, K. de Koning, R. Kanaar, J. H. G. Lebbink, Experimental evidence  
537 for enhanced receptor binding by rapidly spreading SARS-CoV-2 variants.  
538 *bioRxiv*, 2021.2002.2022.432357 (2021).
- 539 41. S. Du *et al.*, Structurally Resolved SARS-CoV-2 Antibody Shows High Efficacy  
540 in Severely Infected Hamsters and Provides a Potent Cocktail Pairing Strategy.  
541 *Cell* **183**, 1013-1023 e1013 (2020).
- 542 42. J. Kreye *et al.*, A Therapeutic Non-self-reactive SARS-CoV-2 Antibody Protects  
543 from Lung Pathology in a COVID-19 Hamster Model. *Cell* **183**, 1058-1069  
544 e1019 (2020).
- 545 43. J. Ge *et al.*, Antibody neutralization of SARS-CoV-2 through ACE2 receptor  
546 mimicry. *Nat Commun* **12**, 250 (2021).



- 547 44. Q. Zhang *et al* (2021). Potent and protective IGHV3-53/3-66 public antibodies  
548 and their shared escape mutant on the spike of SARS-CoV-2. Manuscript  
549 submitted for publication.
- 550 45. M. Yuan *et al.*, Structural and functional ramifications of antigenic drift in recent  
551 SARS-CoV-2 variants. *bioRxiv*, (2021).
- 552 46. X. Chi *et al.*, A neutralizing human antibody binds to the N-terminal domain of  
553 the Spike protein of SARS-CoV-2. *Science* **369**, 650-655 (2020).
- 554 47. N. Suryadevara *et al.*, Neutralizing and protective human monoclonal  
555 antibodies recognizing the N-terminal domain of the SARS-CoV-2 spike protein.  
556 *bioRxiv*, (2021).
- 557 48. M. McCallum *et al.*, N-terminal domain antigenic mapping reveals a site of  
558 vulnerability for SARS-CoV-2. *bioRxiv*, (2021).
- 559 49. G. Cerutti *et al.*, Potent SARS-CoV-2 Neutralizing Antibodies Directed Against  
560 Spike N-Terminal Domain Target a Single Supersite. *bioRxiv*,  
561 2021.2001.2010.426120 (2021).
- 562 50. S. Sun *et al.*, Characterization and structural basis of a lethal mouse-adapted  
563 SARS-CoV-2. *bioRxiv*, 2020.2011.2010.377333 (2020).
- 564 51. R. Rathnasinghe *et al.*, The N501Y mutation in SARS-CoV-2 spike leads to  
565 morbidity in obese and aged mice and is neutralized by convalescent and post-  
566 vaccination human sera. *medRxiv*, (2021).
- 567 52. K. K. Chan, T. J. C. Tan, K. K. Narayanan, E. Procko, An engineered decoy  
568 receptor for SARS-CoV-2 broadly binds protein S sequence variants. *bioRxiv*,

- 569 (2020).
- 570 53. B. B. Oude Munnink *et al.*, Transmission of SARS-CoV-2 on mink farms  
571 between humans and mink and back to humans. *Science* **371**, 172-177 (2021).
- 572 54. Z. Wang *et al.*, mRNA vaccine-elicited antibodies to SARS-CoV-2 and  
573 circulating variants. *Nature*, (2021).
- 574 55. D. Ho *et al.*, Increased Resistance of SARS-CoV-2 Variants B.1.351 and B.1.1.7  
575 to Antibody Neutralization. *Res Sq*, (2021).
- 576 56. B. Huang *et al.*, Neutralization of SARS-CoV-2 VOC 501Y.V2 by human  
577 antisera elicited by both inactivated BBIBP-CorV and recombinant dimeric  
578 RBD ZF2001 vaccines. *bioRxiv*, 2021.2002.2001.429069 (2021).
- 579 57. E. C. Sabino *et al.*, Resurgence of COVID-19 in Manaus, Brazil, despite high  
580 seroprevalence. *Lancet (London, England)* **397**, 452-455 (2021).
- 581 58. M. Diamond *et al.*, SARS-CoV-2 variants show resistance to neutralization by  
582 many monoclonal and serum-derived polyclonal antibodies. *Res Sq*, (2021).
- 583 59. M. Hoffmann *et al.*, SARS-CoV-2 variants B.1.351 and B.1.1.248: Escape from  
584 therapeutic antibodies and antibodies induced by infection and vaccination.  
585 *bioRxiv*, 2021.2002.2011.430787 (2021).
- 586 60. K. Wu *et al.*, mRNA-1273 vaccine induces neutralizing antibodies against spike  
587 mutants from global SARS-CoV-2 variants. *bioRxiv*, (2021).
- 588 61. M. Yuan *et al.*, A highly conserved cryptic epitope in the receptor binding  
589 domains of SARS-CoV-2 and SARS-CoV. *Science* **368**, 630-633 (2020).
- 590 62. Y. Liu *et al.*, Functional and Genetic Analysis of Viral Receptor ACE2

- 591 Orthologs Reveals a Broad Potential Host Range of SARS-CoV-2. *bioRxiv*,  
592 2020.2004.2022.046565 (2021).
- 593 63. Aquarium: an automatic data-processing and experiment information  
594 management system for biological macromolecular crystallography beamlines.  
595 *Journal of Applied Crystallography* **52**, (2019).
- 596 64. A. J. McCoy *et al.*, Phaser crystallographic software. *J Appl Crystallogr* **40**,  
597 658-674 (2007).
- 598 65. P. D. Adams *et al.*, PHENIX: building new software for automated  
599 crystallographic structure determination. *Acta crystallographica. Section D*,  
600 *Biological crystallography* **58**, 1948-1954 (2002).
- 601 66. P. Emsley, K. Cowtan, Coot: model-building tools for molecular graphics. *Acta*  
602 *crystallographica. Section D, Biological crystallography* **60**, 2126-2132 (2004).
- 603 67. G. Janson, C. Zhang, M. G. Prado, A. Paiardini, PyMod 2.0: improvements in  
604 protein sequence-structure analysis and homology modeling within PyMOL.  
605 *Bioinformatics (Oxford, England)* **33**, 444-446 (2017).
- 606 68. E. F. Pettersen *et al.*, UCSF Chimera--a visualization system for exploratory  
607 research and analysis. *Journal of computational chemistry* **25**, 1605-1612  
608 (2004).

609

## 610 **Acknowledgements**

611 We acknowledge the work and contribution of all the health providers from Beijing  
612 Youan Hospital, Beijing Ditan Hospital and Shenzhen Third People's Hospital. We also

613 thank patients for their active participation. This study was supported by the National  
614 Key Plan for Scientific Research and Development of China (2020YFC0848800 and  
615 2020YFC0849900), the National Natural Science Foundation Award (81530065,  
616 91442127 and 32000661), the Science and Technology Innovation Committee of  
617 Shenzhen Municipality (202002073000002). It is also supported by funds from the  
618 COVID-19 Science and Technology Project of Beijing Hospitals Authority (YGZX-  
619 C1), Beijing Advanced Innovation Center for Structural Biology, Beijing Municipal  
620 Science and Technology Commission (Z201100005420019), Tsinghua University  
621 Scientific Research Program (20201080053 and 2020Z99CFG004), Tencent  
622 Foundation, Shuidi Foundation, TH Capital and the National Science Fund for  
623 Distinguished Young Scholars (82025022), China Postdoctoral Science Foundation  
624 (2020T130062ZX). The funders had no role in study design, data collection, data  
625 analysis, data interpretation or writing of the report. We thank the SSRF BL17U1  
626 beamline for data collection and processing.

627

628

### 629 **Author contributions**

630 L.Z., X.W., T.Z. conceived and designed the study. R.W., Q.Z. and J.G. performed most  
631 of the experiments with assistance from R.Z., J.L. and P.C.. J.G. and J. L. produced the  
632 RBD and ACE2 recombinant proteins, solved and analyzed the crystal structure of the  
633 antibody-RBD complex. P.C. provided an assistance in antibody production. W.R and  
634 Q.D. provided HeLa cell lines expressing ACE2 from diverse origin. T.Z., F.Z., Z.Z.

635 and H.L. provided clinical care and management of infected patients, and particularly  
636 the recruitment and following up the study subjects. T.Z., F.Z., Z.Z., B.J., B.S., F.Y., Y.F.,  
637 X.L and X.S. conducted sample collection, processing, and initial characterization.  
638 R.W., Q.Z., J.G., T. Z., X.W. and L.Z. had full access to data in the study, generated  
639 figures and tables, and take responsibility for the integrity and accuracy of the data  
640 presentation. X.W. and L.Z. wrote the manuscript. All authors reviewed and approved  
641 the final version of the manuscript.

642

#### 643 **Competing interests**

644 The authors have filed patent applications on some of the antibodies described.

645

#### 646 **Data and materials availability**

647 Data and reagents presented in the manuscript and the supplementary materials are  
648 available from the corresponding author upon reasonable request. The coordinates and  
649 structure factors files for P2C-1F11 and RBD-3M complex have been deposited to the  
650 Protein Data Bank ([www.rcsb.org](http://www.rcsb.org)) with accession code 7E8M.

Supplementary Materials for

**SARS-CoV-2 variants resist antibody neutralization  
and broaden host ACE2 usage**

Ruoke Wang<sup>1,2,#</sup>, Qi Zhang<sup>1,#</sup>, Jiwan Ge<sup>3,#</sup>, Wenlin Ren<sup>4</sup>, Rui Zhang<sup>1</sup>, Jun Lan<sup>3</sup>, Bin Ju<sup>5,6</sup>, Bin Su<sup>7</sup>, Fengting Yu<sup>8</sup>, Peng Chen<sup>1</sup>, Huiyu Liao<sup>7</sup>, Yingmei Feng<sup>7</sup>, Xuemei Li<sup>7</sup>, Xuanling Shi<sup>1</sup>, Zheng Zhang<sup>5,6</sup>, Fujie Zhang<sup>8</sup>, Qiang Ding<sup>4</sup>, Tong Zhang<sup>7,\*</sup>, Xinquan Wang<sup>3,\*</sup>, Linqi Zhang<sup>1,\*</sup>

Correspondence to: zhanglinqi@tsinghua.edu.cn,  
xinquanwang@mail.tsinghua.edu.cn, zt\_doc@ccmu.edu.cn

**This PDF file includes:**

Materials and Methods

Figs. S1 to S5

Tables S1 to S2

## 24 **Materials and Methods**

25

### 26 **Study approval.**

27 This study received approval from the Research Ethics Committee of Beijing You'an  
28 Hospital (LL-2020-039-K), Beijing Ditan Hospital (2020-019-01), and Shenzhen Third  
29 People's Hospital (2020-084). The research was conducted in strict accordance with the  
30 rules and regulations of the Chinese government for the protection of human subjects.  
31 The study subjects agreed and signed the written informed consents for research use of  
32 their blood samples.

33

### 34 **Convalescent patients and blood samples**

35 The study enrolled a total of 23 convalescent patients aged from 29 to 81 years old,  
36 with an average of 56, infected with SARS-Cov-2 between January to February 2020.  
37 SARS-Cov-2 infection status was verified by RT-PCR of nasopharyngeal swab and  
38 chest computed tomographic scan. Of the 23 infected individuals, 13 were males and  
39 10 were females. Twelve individuals developed only mild symptom and the remaining  
40 11 developed severe pneumonia. Convalescent blood samples were collected during  
41 hospitalization or follow-up visits in Beijing You'an Hospital, Beijing Ditan Hospital,  
42 or Shenzhen Third People's Hospital, within two months after symptom onset. A blood  
43 sample from a healthy control individual was also included. Blood samples were  
44 separated into plasma and peripheral blood mononuclear cells (PBMC) by Ficoll-  
45 Hypaque gradient (GE Healthcare) centrifugation. All plasma samples were heat-  
46 inactivated at 56 °C for 1h before being stored at -80 °C. PBMCs were maintained in  
47 freezing media and stored in liquid nitrogen until use.

48

### 49 **Production of mAbs and Fab**

50 P2C-1F11, P5A-1D2, P5A-3C8, P22A-1D2, P5A-1B9 and P2B-1G5 are potent  
51 neutralizing mAbs initially isolated from SARS-CoV-2 infected patients by our group  
52 and previously published (58). Antibodies published by other groups including  
53 REGN10933, REGN10987, CB6, S309, 4A8 and CR3022 were synthesized according  
54 to the sequences released in Protein Data Bank (PDB) (59-63). Antibody production  
55 was conducted by co-transfection of the heavy and light chain expression vectors into  
56 HEK 293F cells using polyethyleneimine (PEI)(Sigma). After 96h, antibodies secreted  
57 into the supernatant were captured by Protein A-Sepharose (GE Healthcare) and eluted  
58 by solution buffer Glycine pH 3.0. After further purification by gel-filtration  
59 chromatography with Superdex 200 High-Performance column (GE Healthcare),  
60 antibody concentration was determined by nanodrop 2000 Spectrophotometer (Thermo  
61 Scientific). To produce Fab fragment, purified P2C-1F11 were cleaved using  
62 Endoproteinase Lys-C (Roche) with IgG to Lys-C ratio of 4000:1 (w/w) in 10 mM  
63 EDTA, 100 mM Tris-HCl, pH 8.5 at 37°C overnight. Fc fragment were removed using  
64 Protein A-Sepharose.

65

### 66 **Production of SARS-CoV-2 wild-type and variant pseudoviruses**

67 The wildtype pseudovirus used throughout the analysis was the prototype Wuhan-Hu-1  
68 strain (GenBank: MN908947.3) with a D614G mutation (WT D614G). The variant  
69 UK501Y.V1 (GISAID: EPI\_ISL\_601443) was constructed with total of 9 mutations  
70 including 69-70del, 144del, N501Y, A570D, D614G, P681H, T716I, S982A and  
71 D1118H. The variant SA501Y.V2 (GISAID: EPI\_ISL\_700450) was constructed with  
72 10 mutations including L18F, D80A, D215G, 242-244del, S305T, K417N, E484K,  
73 N501Y, D614G and A701V. The variant BR501Y.V3 (GISAID: EPI\_ISL\_792681)  
74 was constructed with 12 mutations including L18F, T20N, P26S, D138Y, R190S,  
75 K417T, E484K, N501Y, D614G, H655Y, T1027I and V1176F. The gene of variants  
76 were synthesized In Genwiz, Inc. The single mutations identified from the GISAID  
77 database were introduced into the pcDNA3.1 vector encoding WT D614G using  
78 QuickChange site-directed mutagenesis (Agilent 210519). SARS-Cov-2 pseudoviruses  
79 were generated by co-transfecting HEK-293T cells (ATCC) with human  
80 immunodeficiency virus backbones expressing firefly luciferase (pNL4-3-R-E-  
81 luciferase) and pcDNA3.1 vector encoding either wild-type or mutated S proteins. Viral  
82 supernatant was collected 48h or 72h later, centrifuged to remove cell lysis, and stored  
83 at -80°C until use.

84

#### 85 **HeLa cell lines expressing ACE2 from diverse origin**

86 HeLa cells expressing ACE2 orthologs were kindly provided by Dr. Qiang Ding at  
87 Tsinghua University School of Medicine. The cDNAs encoding ACE2 orthologs were  
88 synthesized by GenScript and cloned into pLVX-IRES-zsGreen1 vectors (Catalog No.  
89 632187, Clontech Laboratories, Inc) with a C-terminal FLAG tag. VSV-G pseudotyped  
90 lentiviruses expressing ACE2 orthologs were produced and used to generate HeLa-  
91 ACE2 cells as previously described (64). For studying entry efficiency of SARS-CoV-  
92 2 variants, HeLa-ACE2 cells were added to 96 well plates, mixed with 50 ul of  
93 pseudovirus, and analyzed the luciferase activities 60 h after infection using Bright-Glo  
94 Luciferase Assay Vector System (Promega Bioscience). Absolute and fold changes  
95 between mutated and WT D614G were used to estimate the entry efficiency of SARS-  
96 CoV-2 variants.

97

#### 98 **mAbs and plasma neutralization using pseudoviruses**

99 Serial dilutions of mAbs were prepared with the highest concentration of 1 µg/ml except  
100 for S309 and P2B-1G5 (10 µg/ml). Serial dilutions of convalescent plasma were  
101 prepared with the highest dilution of 1:60 except for P#2, P#5, P#22 and International  
102 Standard for anti-SARS-CoV-2 immunoglobulin (human) (NIBSC code: 20/136)  
103 where 1:200 was the initial dilution. Wild type or mutated spike pseudovirus were  
104 mixed with mAbs or plasma and incubated at 37°C for 1h. HeLa-ACE2 cells were then  
105 added into the mixture and incubated at 37°C for 60h before cell lysis for measuring  
106 luciferase-activity. Th percent of neutralization was determined by comparing with the  
107 virus control. Half-maximal inhibitory concentration (IC<sub>50</sub>) or dilutions (ID<sub>50</sub>) were  
108 calculated using GraphPad Prism 7.

109



110 **Binding of mAb and ACE2 to cell surface-expressed wild-type and mutated S**  
111 **glycoprotein**

112 The entire procedure was conducted as previously published (65). Specifically, HEK  
113 293T cells were transfected with expression plasmids encoding either wild-type or  
114 mutated SARS-CoV-2 S glycoproteins, and incubated at 37 °C for 36 h. Cells were  
115 digested from the plate with trypsin and distributed onto 96-well plates. Cells were  
116 washed twice with 200 µL staining buffer (PBS with 2% heated-inactivated fetal bovine  
117 serum (FBS)) between each of the following steps. First, cells were stained with the  
118 testing mAb, S2-specific monoclonal antibody (MP Biomedicals, Singapore 08720401),  
119 or ACE2 recombinant protein at 4 °C for 30 min in 100 µL staining buffer. Then, PE-  
120 labeled anti-human IgG Fc (Biolegend 410718), anti-mouse IgG FITC (ThermoFisher  
121 Scientific A10673), or anti-his PE secondary antibody (Miltenyi 130120787) was  
122 added in 40 µL staining buffer at 4 °C for 30 min. After extensive washes, the cells  
123 were resuspended and analyzed with BD LSRFortessa (BD Biosciences, USA) and  
124 FlowJo 10 software (FlowJo, USA). The serial dilution of concentration of mAbs and  
125 ACE2 were tested and the lowest saturated concentrations were used in the assay (2  
126 µg/ml for ACE2, 0.1 µg/ml for all mAbs except for P2B-1G5 and CR3022 where 2  
127 µg/ml was used). HEK 293T cells with mock transfection were stained as background  
128 control. Antibody binding percentages were calculated by the ratio between mutated  
129 over wild-type MFI normalized in relative to that of S2 specific antibody. All MFI  
130 values were weighted by multiplying the number of positive cells in the selected gates.

131

132 **Recombinant RBD and ACE2 protein**

133 Recombinant wildtype RBD, RBD with 417N-484K-501Y mutations, and human  
134 receptor ACE2 peptidase domain were expressed using the Bac-to-Bac Baculovirus  
135 System (Invitrogen) as previously described (66). Specifically, SARS-CoV-2 RBD  
136 (residues Arg319 to Lys529) or ACE2 (residues Ser19 to Asp615) containing the gp67  
137 secretion signal peptide and a C-terminal hexahistidine was inserted into pFastBac-  
138 Dual vectors (Invitrogen) and transformed into DH10 Bac component cells. The  
139 recombinant bacmid was extracted and further transfected into Sf9 cells using  
140 Cellfectin II Reagents (Invitrogen). The recombinant viruses were harvested from the  
141 transfected supernatant and amplified to generate high-titer virus stock. Viruses were  
142 then used to infect Sf9 cells for protein expression. Secreted RBD and ACE2 were  
143 harvested from the supernatant, captured by Ni-NTA Sepharose (GE Healthcare) and  
144 purified by gel filtration chromatography.

145

146 **Crystal analysis and data collection**

147 P2C-1F11 Fab fragments were mixed with SARS-CoV-2 RBD containing K417N-  
148 E484K-N501Y mutations at a molar ratio of 1:1.2, incubated on ice for 2 h, and further  
149 purified by gel-filtration chromatography. The purified complex was concentrated to  
150 11 mg/mL in HBS buffer (10 mM HEPES, pH 7.2, 150 mM NaCl) for crystallization.  
151 Screening trials were performed at 18 °C. The sitting drop vapor diffusion method was  
152 used by mixing 0.2 µL of protein with 0.2 µL of reservoir solution. Crystals of RBD-  
153 Fab complexes were successfully obtained in 0.2 M Ammonium sulfate, 0.1M Tris 8.5,

154 12% w/v PEG 8000. Diffraction data were collected at the BL17U1 beamline of the  
155 Shanghai Synchrotron Research Facility (SSRF) and auto-processed with aquarium  
156 pipeline (67).

157

### 158 **Structural determination and refinement**

159 Structures were determined by the molecular replacement method using PHASER  
160 (CCP4 Program Suite) (68). Search models were the SARS-CoV-2 RBD structure  
161 (PDB ID: 6M0J) and the heavy and light chain variable domain structures available in  
162 the PDB with the highest sequence identities. Subsequent model building and  
163 refinement were performed using COOT and PHENIX, respectively (69, 70). All  
164 structural figures were generated using PyMOL and Chimera (71, 72).

165

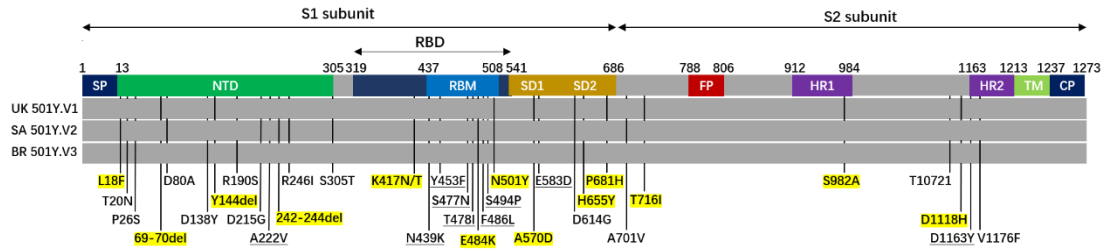

166

167 **Fig. S1. Mutant residues along the S protein identified in SARS-CoV-2 variants**  
168 **UK501Y.V1, SA501Y.V2, and BR501Y.V3.** Each variant contains combination of  
169 mutant residues, indicated by the black vertical lines, some of which are unique while  
170 others are shared among the variants. Those highlighted in yellow represent the  
171 mutant residues studied here either singly or in combination. Nine mutant residues  
172 were underlined that were not identified in the three variants but included in the study  
173 due to their high representation in the GISAID database. SP, signal peptide; NTD, N-  
174 terminal domain; RBD, receptor binding domain; RBM, receptor binding motif; SD,  
175 subdomain; FP, fusion peptide; HR1, heptad repeat 1; HR2, heptad repeat 2; TM,  
176 transmembrane domain; and CP, cytoplasmic domain.

177

178

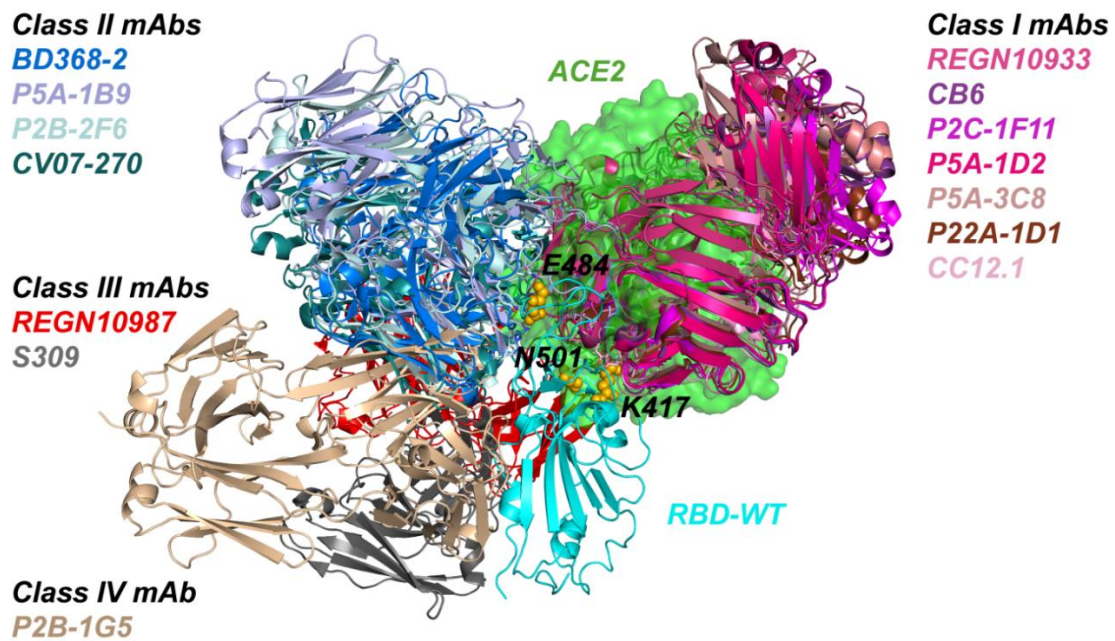

179

180

181 **Fig. S2. The binding mode of four classes anti-RBD antibodies.** Listed antibodies  
182 are the ones studied and analyzed here. Their Fab fragments are superposed onto P2C-  
183 1F11/RBD crystal structure (PDB: 7CDI) in relative to RBD/ACE2 complex (PDB:  
184 6M0J). P2C-1F11 is colored in magenta, RBD in cyan, and ACE2 in green. The color  
185 scheme used for the name and structure of each antibody are the same. The three  
186 residues (K417, E484, and N501) critical for binding to ACE2 and antibodies are  
187 shown as yellow-colored spheres.

188

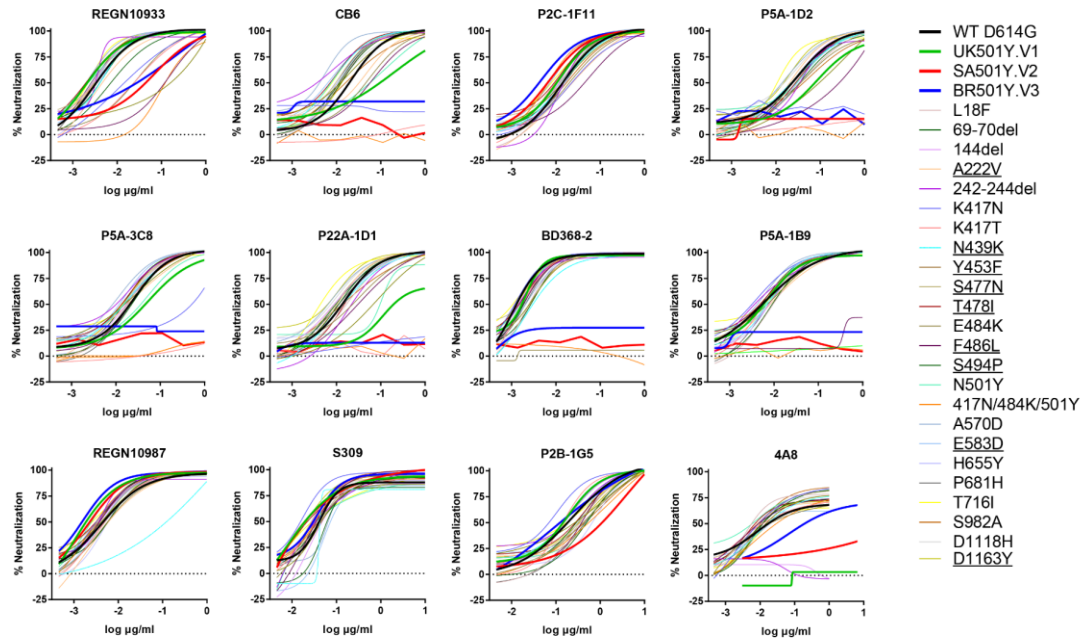

189

190 **Fig. S3. Neutralization of SARS-CoV-2 variants by each antibody.** Pseudoviruses  
191 bearing the indicated mutations were tested against serial dilutions of each mAb.  
192 Neutralizing activity was defined as the percent reduction in luciferase activities  
193 compared to no antibody controls. Levels of resistance were calculated as the -fold  
194 change in IC<sub>50</sub> between each mutant and WT D614G, as presented in Figure 1A.  
195 Results were calculated from three independent experiments.

196

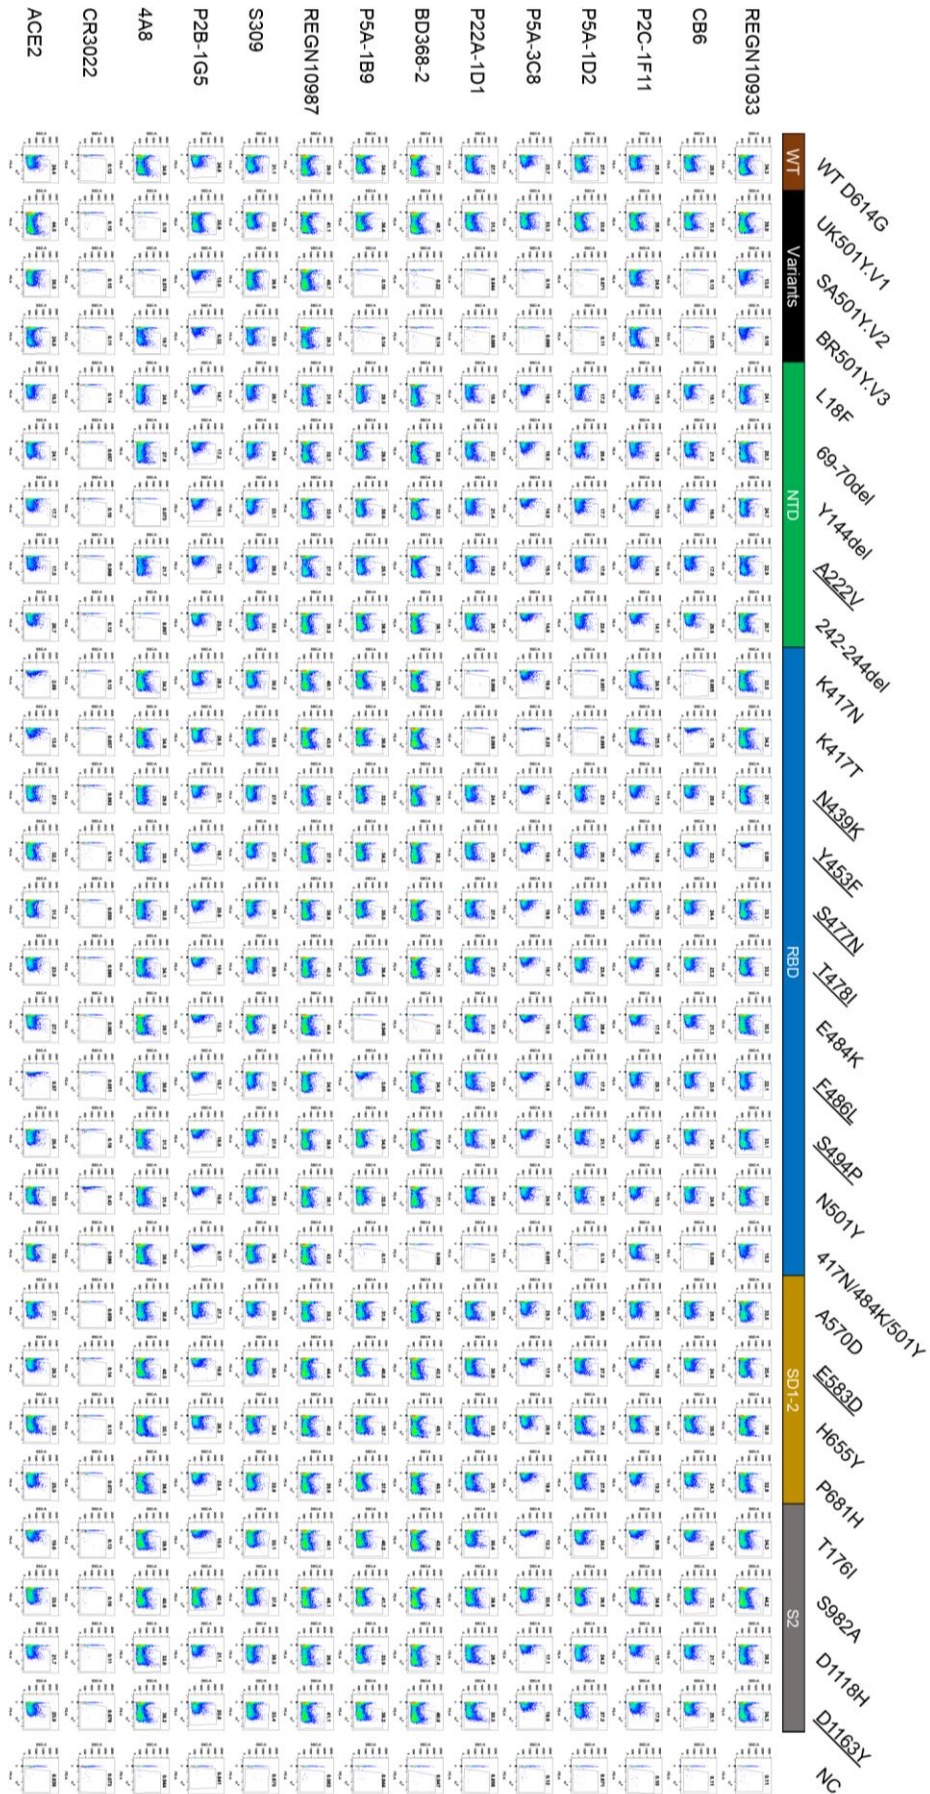

198 **Fig. S4 Binding to cell surface expressed SARS-CoV-2 variants by each antibody.**

199 Wildtype and mutant S proteins were expressed on the surface of HEK 293T,  
200 incubated with the mAbs or human soluble ACE2 under study, followed by staining  
201 with anti-human IgG Fc PE or anti-his PE, and analyzed by FACS. The gated cell  
202 percentages are shown. The fold changes in antibody binding, as shown in Fig. 1B,  
203 was determined by comparing the total MFI in the selected gate between S variants  
204 and WT D614G. Data shown were calculated from three independent experiments.  
205 CR3022 is a negative control antibody. NC is HEK 293T cells with mock  
206 transfection.

207

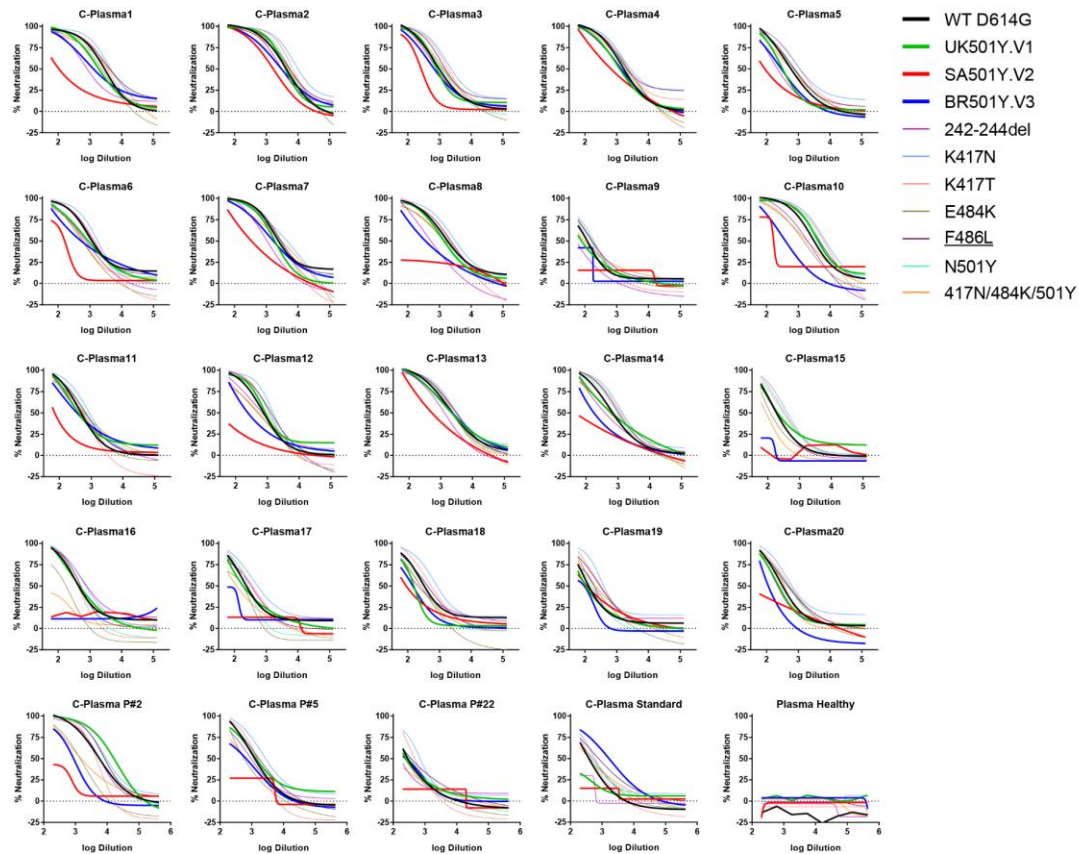

208

209 **Fig. S5 Neutralization of SARS-CoV-2 variants by each convalescent plasma.**  
210 Pseudoviruses bearing the indicated mutations were tested against serial dilutions of  
211 convalescent plasma. Neutralization activity was defined as the percent reduction in  
212 luciferase activity relative to no serum control. The actual ID50 and the -fold changes  
213 between each mutant and WT D614G pseudovirus were calculated to estimate the  
214 resistance levels shown in Figure 3. Results were calculated from three independent  
215 experiments.  
216



217 **Table S1.**

218 Data collection and refinement statistics (molecular replacement)

219

|                                                      | RBD-K417N-E484K-<br>N501Y-P2C-1F11<br>complex |
|------------------------------------------------------|-----------------------------------------------|
| <b>Data collection</b>                               |                                               |
| Space group                                          | C2                                            |
| Cell dimensions                                      |                                               |
| <i>a, b, c</i> (Å)                                   | 195.844, 85.973, 57.872                       |
| <i>a, b, c</i> (°)                                   | 90, 99.75, 90                                 |
| Resolution (Å)                                       | 50.00-2.094 (2.15-<br>2.094)*                 |
| <i>R</i> <sub>sym</sub> or <i>R</i> <sub>merge</sub> | 0.088(0.384)                                  |
| <i>I</i> / <i>sI</i>                                 | 17.2(3.2)                                     |
| Completeness (%)                                     | 90.92 (54.79)                                 |
| Redundancy                                           | 5.3(2.3)                                      |
| <b>Refinement</b>                                    |                                               |
| Resolution (Å)                                       | 20.98-2.094                                   |
| No. reflections                                      | 50684                                         |
| <i>R</i> <sub>work</sub> / <i>R</i> <sub>free</sub>  | 16.9/19.7                                     |
| No. atoms                                            |                                               |
| Protein                                              | 4728                                          |
| Ligand/ion                                           | 14                                            |
| <i>B</i> -factors                                    |                                               |
| Protein                                              | 41.18                                         |
| Ligand/ion                                           | 81.75                                         |
| R.m.s. deviations                                    |                                               |
| Bond lengths (Å)                                     | 0.007                                         |
| Bond angles (°)                                      | 0.89                                          |

220

221 \*One crystal for the data

222 \*Values in parentheses are for highest-resolution shell.

223

224 **Table S2.**

225 Molecular interaction between P2C-1F11 and mutant RBD-K417N-E484K-N501Y

226

|                        |               | <b>P2C-1F11</b> | <b>Length (Å)</b> | <b>Interactions</b> |
|------------------------|---------------|-----------------|-------------------|---------------------|
| <b>P2C-1F11/RBD</b>    | E/K417/N[N]   | H/Y52/CE2[C]    | 3.84              |                     |
|                        |               | H/Y52/OH[O]     | 3.87              | Hydrogen bond       |
|                        | E/K417/CG[C]  | H/Y52/CE2[C]    | 3.85              |                     |
|                        |               | H/Y52/CZ[C]     | 3.97              |                     |
|                        |               | H/Y52/OH[O]     | 3.32              |                     |
|                        | E/K417/CE[C]  | H/Y52/OH[O]     | 3.69              |                     |
|                        | E/K417/NZ[N]  | H/Y52/OH[O]     | 3.19              | Hydrogen bond       |
|                        | E/K417/CD[C]  | H/Y33/OH[O]     | 4.02              |                     |
|                        | E/K417/CE/[C] | H/Y33/OH[O]     | 4.03              |                     |
| <b>P2C-1F11/RBD-3M</b> | E/N417/N[N]   | H/Y52/CE2[C]    | 3.82              |                     |
|                        |               | H/Y52/OH[O]     | 3.53              | Hydrogen bond       |
|                        | E/Y453/CE1[C] | L/Y33/OH[O]     | 3.50              |                     |
|                        | E/Y453/CZ[C]  | L/Y33/OH[O]     | 3.43              |                     |
|                        | E/Y453/OH[O]  | L/Y33/CE1[C]    | 3..58             |                     |
|                        |               | L/Y33/CZ[C]     | 3..47             |                     |
|                        |               | L/Y33/OH[O]     | 2.52              |                     |
|                        | E/Q493/CG[C]  | L/Y33/OH[O]     | 3.62              |                     |
|                        | E/Q493/NE2[N] | L/S32/CB[C]     | 3.96              |                     |
|                        |               | L/S32/OG/[O]    | 3.77              |                     |
|                        | E/T500/C[C]   | L/S28/OG[O]     | 3.90              |                     |
|                        | E/T500/O[O]   | L/S28/CB[C]     | 3.30              |                     |
|                        |               | L/S28/OG[O]     | 3.01              |                     |
|                        | E/Y501/CA[C]  | L/S28/OG[O]     | 3.87              |                     |
|                        | E/Y501/CE1[C] | L/V29/O[O]      | 3.79              |                     |
|                        | E/Y501/CZ[C]  | L/S30/CA[C]     | 3.94              |                     |
|                        | E/Y501/OH[O]  | L/S30/CA[C]     | 3.82              |                     |
| L/S30/CB[C]            |               | 3.85            |                   |                     |
| L/S30/OG[O]            |               | 3.85            |                   |                     |

227

228
